# Supplementary material for: Probing the ligand exchange kinetics of phenynyl-based ligands on colloidal Au nanoparticles
Source: Royal Society of Chemistry journal article supplement (doi:10.1039/d0qm00612b), 2020-10-27
Supplement: d0qm00612b1.pdf [file d0qm00612b1.pdf]

Electronic Supplementary Information

## **Probing the Ligand Exchange Kinetics of Phenynyl-based Ligands on Colloidal Au Nanoparticles**

*Ting Xiang, Jianpeng Zong, Wenjia Xu, Yuhua Feng\* and Hongyu Chen\**

Institute of Advanced Synthesis (IAS), School of Chemistry and Molecular Engineering, Jiangsu  
National Synergetic Innovation Centre for Advanced Materials, Nanjing Tech University, Nanjing  
211816, P. R. China.

Email: [ias\\_hychen@njtech.edu.cn](mailto:ias_hychen@njtech.edu.cn); [ias\\_yhfeng@njtech.edu.cn](mailto:ias_yhfeng@njtech.edu.cn)

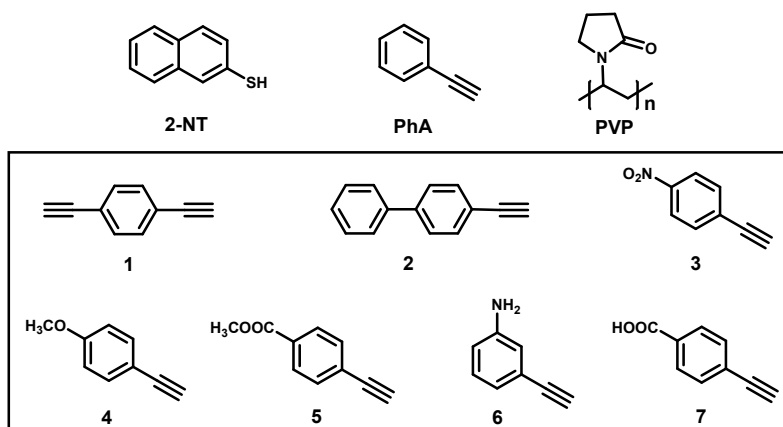

**Figure S1.** Ligands used in the study: 2-naphthalenethiol (2-NT); phenylacetylene (PhA); polyvinylpyrrolidone (PVP); 1, 1,4-diethynylbenzene; 2, 4-ethynyl-1,1'-biphenyl; 3, 4-nitrophenylacetylene; 4, 4-ethynylanisole; 5, 4-ethynyl-benzoic acid methyl ester; 6, 3-aminophenylacetylene; 7, 4-ethynyl-benzoic acid.

## Chemicals

All chemicals were used as received without further purification. Hydrogen tetrachloroaurate (III) trihydrate ( $\text{HAuCl}_4$ , 99.9%, Au 49% on metals basis, Alfa Aesar); sodium citrate tribasic dihydrate ( $\text{NaC}_6\text{H}_5\text{O}_7 \cdot 2\text{H}_2\text{O}$ , 99%, Alfa Aesar); sodium hydroxide ( $\text{NaOH}$ , 96%, Aladdin); 2-naphthalenethiol ( $\text{C}_{10}\text{H}_8\text{S}$ , 98%, Aldrich); polyvinylpyrrolidone (PVP, Mw = 40,000, Aldrich); phenylacetylene ( $\text{C}_8\text{H}_6$ , 96%, Energy); 1,4-diethynylbenzene ( $\text{C}_{10}\text{H}_6$ , 97%, J&K); 4-ethynyl-1,1'-biphenyl ( $\text{C}_{14}\text{H}_{10}$ , 98%, Energy); 4-nitrophenylacetylene ( $\text{C}_8\text{H}_5\text{NO}_2$ , 97%, J&K); 4-ethynylanisole ( $\text{C}_9\text{H}_8\text{O}$ , 98%, Macklin); 4-ethynyl-benzoic acid methyl ester ( $\text{C}_{10}\text{H}_8\text{O}_2$ , 97%, Aladdin); 3-aminophenylacetylene ( $\text{C}_8\text{H}_7\text{N}$ , 99%, J&K); 4-ethynyl-benzoic acid ( $\text{C}_9\text{H}_6\text{O}_2$ , 96%, Adamas); N,N-dimethylformamide (DMF, 99.9%, J&K); deionized water (resistance  $> 18.2 \text{ M}\Omega \cdot \text{cm}^{-1}$ ).

## Characterizations

Absorption spectra were collected on a Cary 100 UV-Vis spectrophotometer (VARIAN). TEM images were collected by using Transmission Electron Microscopy operated at 120 kV (FEI-Talos L120C). Raman and SERS spectra were collected from the as-synthesized sample solutions in a quartz cuvette (pathlength = 1.00 cm) on a portable Raman analyzer (Accuman SR-510 Pro) equipped with 785 nm red LED laser. The laser power is 350 mW and the integration time is 3 s.

XPS spectra were collected on Thermo Fisher Scientific X-ray photoelectron spectrometer (K-ALPHA+).

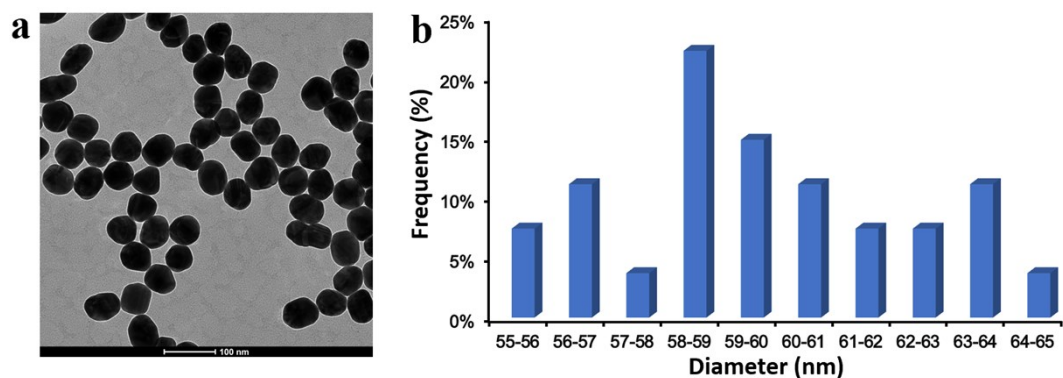

**Figure S2.** (a) TEM image of the as-synthesized 60 nm AuNPs; (b) the size distribution of the AuNPs.

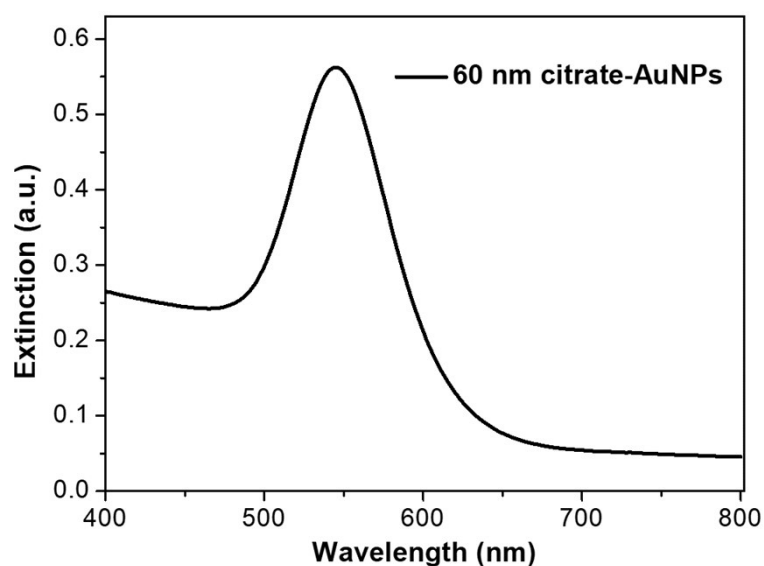

**Figure S3.** UV-vis spectra of 60 nm citrate-AuNPs.

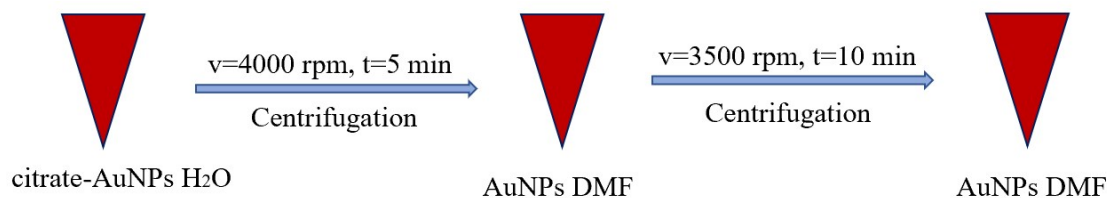

**Figure S4.** Schematics illustrating the phase transfer of 60 nm citrate-AuNPs from water to DMF.

**The calculation of SERS enhancement factor:**

The 1588 cm<sup>-1</sup> Raman peak of PhA, whose intensity is the strongest in both Raman and SERS spectra, was used to calculate the SERS enhancement factor of PhA-AuNPs. The calculation is based on the following equation:

$$EF = (I_{\text{SERS}} \times C_{\text{bulk}}) / (I_{\text{bulk}} \times C_{\text{SERS}})$$

Where  $I_{\text{SERS}}$  and  $I_{\text{bulk}}$  are the Raman intensities of the same 1588 cm<sup>-1</sup> peak for PhA-AuNPs and PhA in DMF solution,  $C_{\text{SERS}}$  and  $C_{\text{bulk}}$  are the concentrations of PhA on AuNPs (PhA-AuNPs) and PhA in DMF solution.

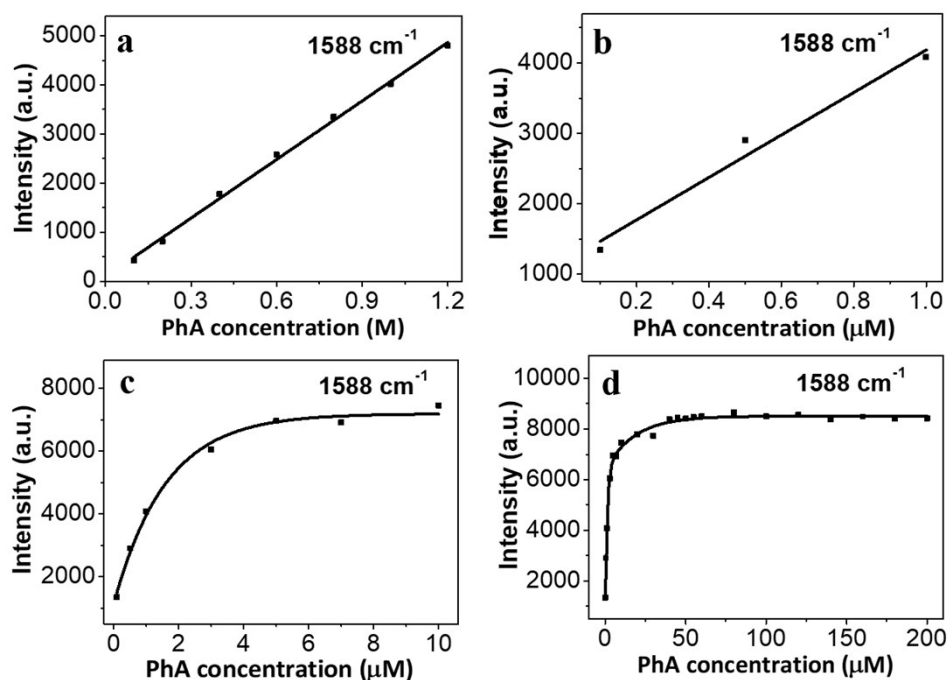

**Figure S5.** (a) Plot and linear fit of Raman intensity vs PhA concentration in DMF (0~1.2 M) for 1588 cm<sup>-1</sup> Raman peak. SERS intensity of (b) 0.1~1 μM, (c) 0.1~10 μM, (d) 0.1~200 μM PhA-AuNPs in DMF.

We find that the PhA concentration (0.2 M) is near the linear fit, the corresponding SERS intensity is 913, and the SERS intensity of PhA (1 μM) is 4081, the EF is  $8.9 \times 10^5$ .

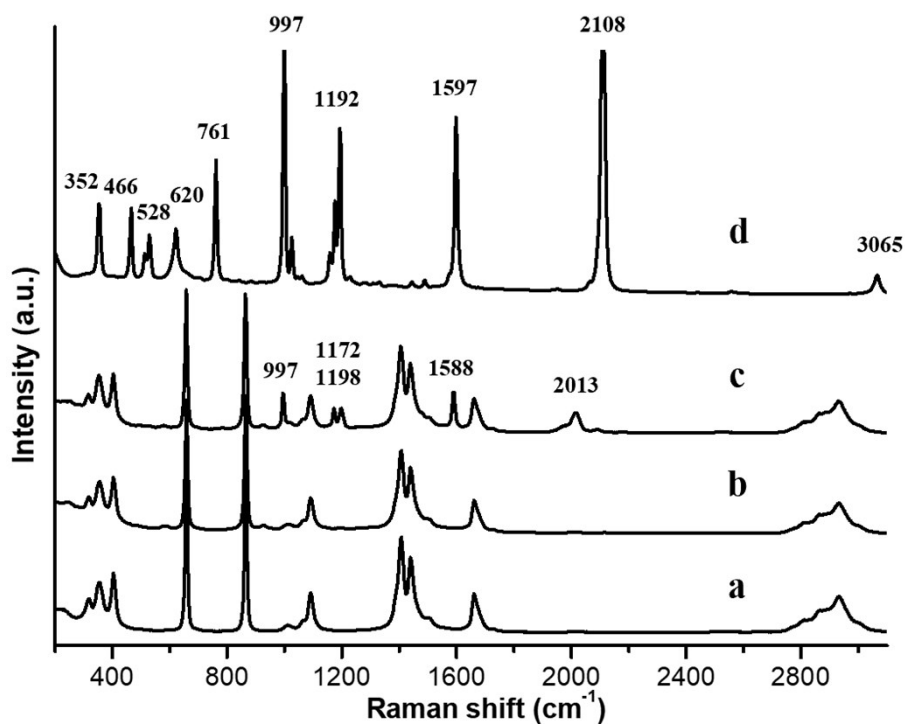

**Figure S6** (a) Raman spectra of pure DMF. (b) SERS intensity of 60 nm citrate-AuNPs in DMF. (c) SERS intensity of 8.3  $\mu\text{M}$  PhA-AuNPs in DMF. (d) Raman spectra of pure PhA.

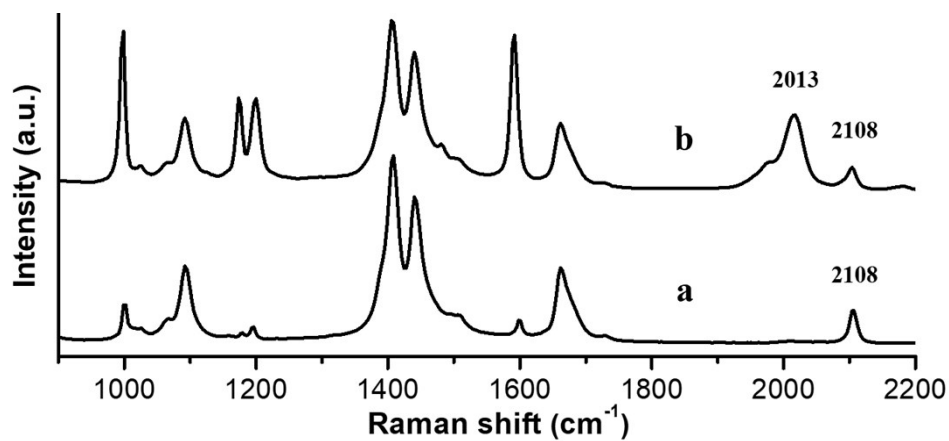

**Figure S7.** (a) Raman spectra of 200 mM pure PhA in DMF. (b) SERS intensity of 200 mM PhA-AuNPs in DMF.

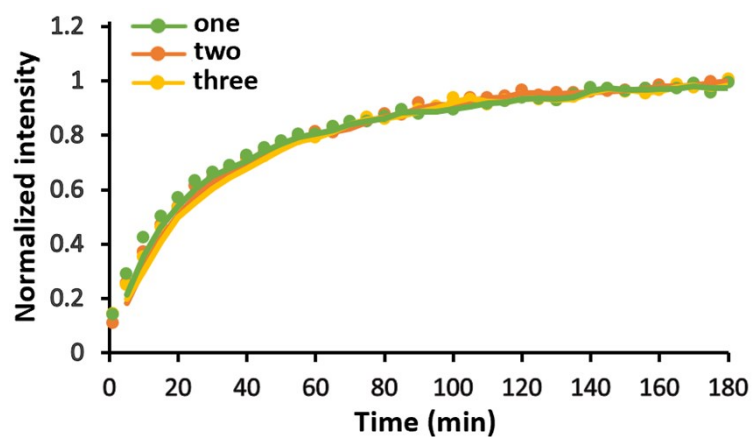

**Figure S8.** Normalized traces of SERS intensity at 2133 cm<sup>-1</sup> during the incubation of citrate-AuNPs with 8.3 μM PhA in DMF for the same three samples.

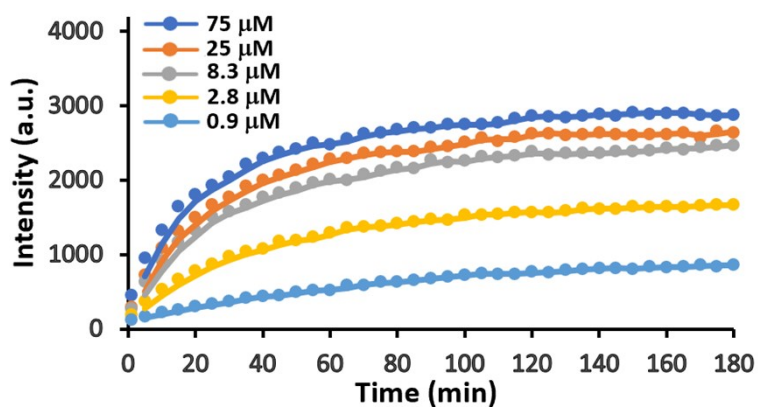

**Figure S9.** Normalized traces of SERS intensity at 2133 cm<sup>-1</sup> during the incubation of citrate-AuNPs with PhA in DMF for the different concentration samples.

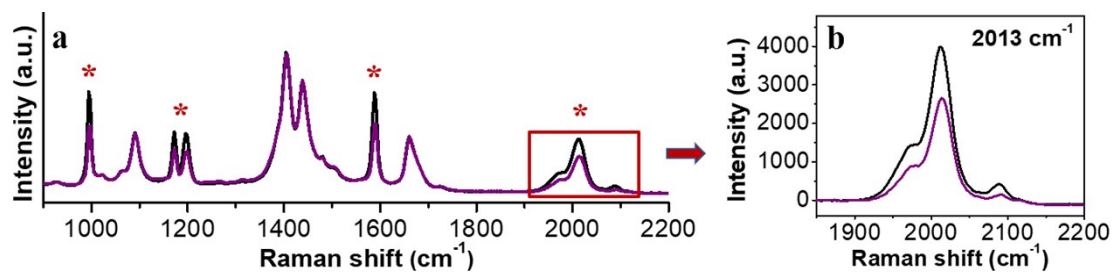

**Figure S10.** (a) SERS intensity of citrate-AuNPs after 3 h incubation with 8.3 μM PhA ligand without (black) and with (purple) Ar gas bubbling. (b) Expansion of the framed region in a.

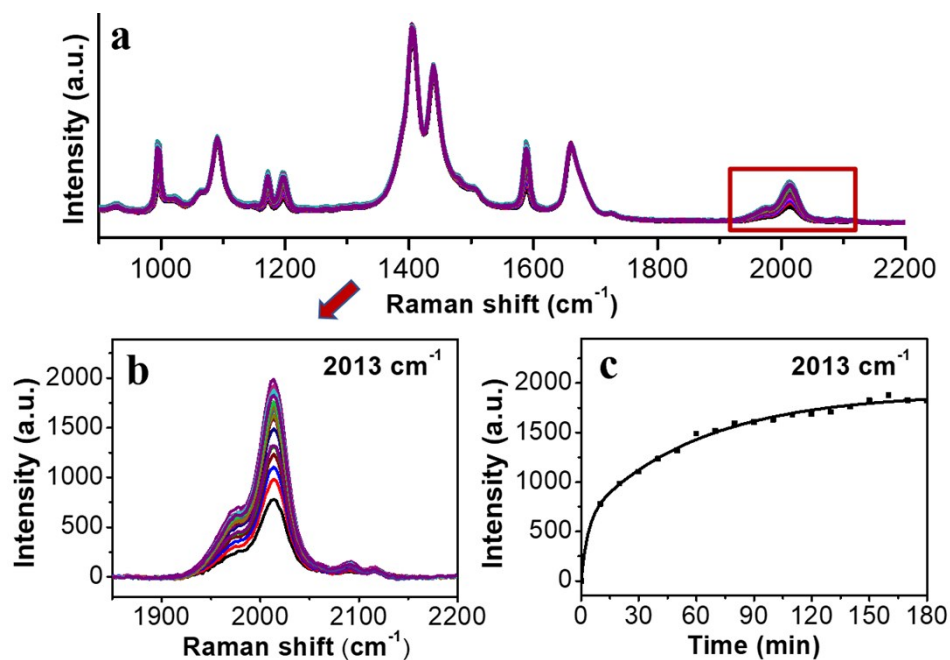

**Figure S11.** (a) Temporal evolution of the SERS intensity of citrate-AuNPs incubated with 8.3  $\mu\text{M}$  PhA under Ar atmosphere in a cuvette which was sealed in a glove box. (b) Expansion of the framed region in a. (c) Intensity traces of the peak in b.

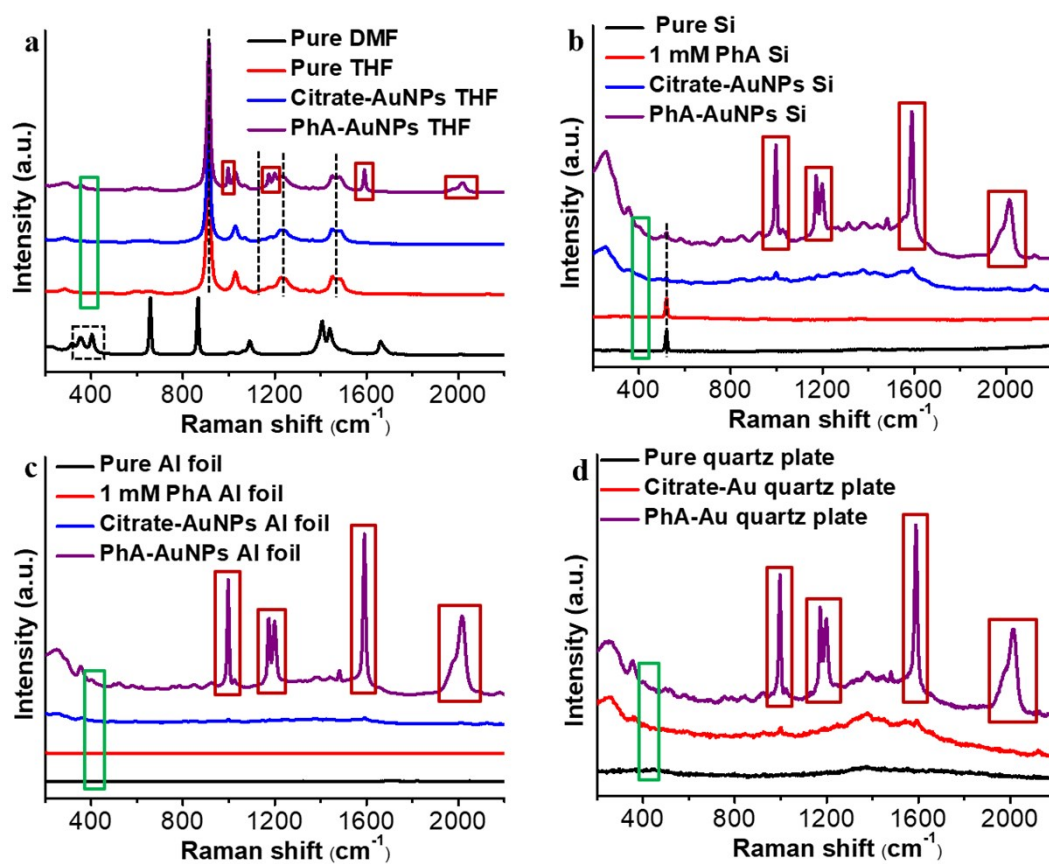

**Figure S12.** (a) Raman spectra of pure DMF (black), pure THF (red); SERS intensity of 60 nm

citrate-AuNPs (blue), PhA-AuNPs (purple) in THF. (b) Raman spectra of pure Si (black), 1 mM PhA (red) on Si; SERS intensity of 60 nm citrate-AuNPs (blue), PhA-AuNPs (purple) on Si. (c) Raman spectra of pure Al foil (black), 1 mM PhA (red) on Al foil; SERS intensity of 60 nm citrate-AuNPs (blue), PhA-AuNPs on Al foil. (d) Raman spectra of pure quartz plate (black); SERS intensity of 60 nm citrate-AuNPs (red), PhA-AuNPs (purple) on quartz plate.

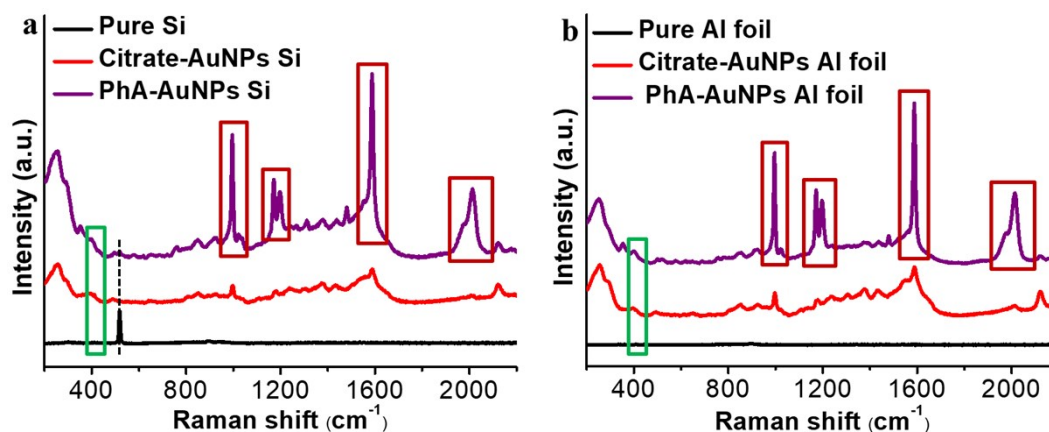

**Figure S13.** (a) Raman spectra of pure Si (black); SERS intensity of 60 nm citrate-AuNPs (red), PhA-AuNPs (purple) on Si. (b) Raman spectra of pure Al foil (black); SERS intensity of 60 nm citrate-AuNPs (red), PhA-AuNPs on Al foil.

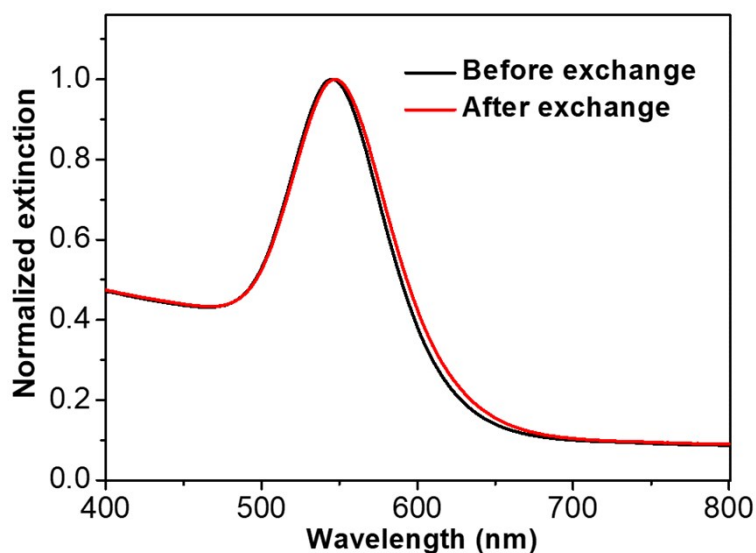

**Figure S14.** UV-vis spectra of AuNPs in DMF before and after 2-NT exchange PhA.

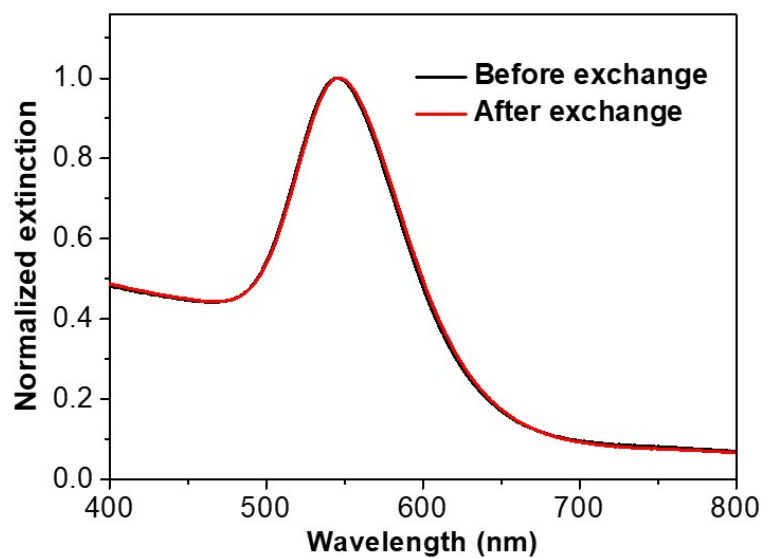

**Figure S15.** UV-vis spectra of AuNPs in DMF before and after PhA exchange 2-NT.

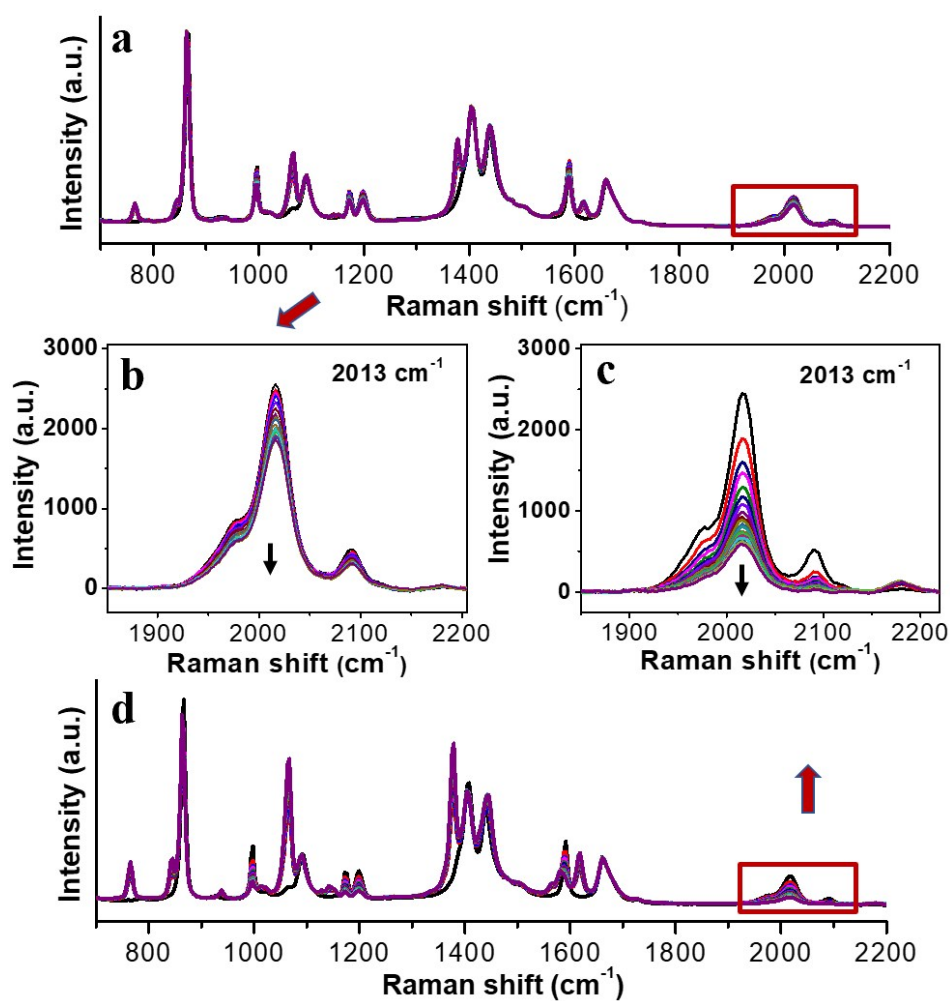

**Figure S16.** (a) Temporal evolution of the SERS intensity of 8.3  $\mu\text{M}$  PhA-AuNPs incubated with 8.2  $\mu\text{M}$  2-NT in DMF at room temperature. (b) Expansion of the framed region in a. (c)

Expansion of the framed region in d. (d) Temporal evolution of the SERS intensity of 8.3  $\mu\text{M}$  PhA-AuNPs incubated with 8.2  $\mu\text{M}$  2-NT in DMF at 60°C.

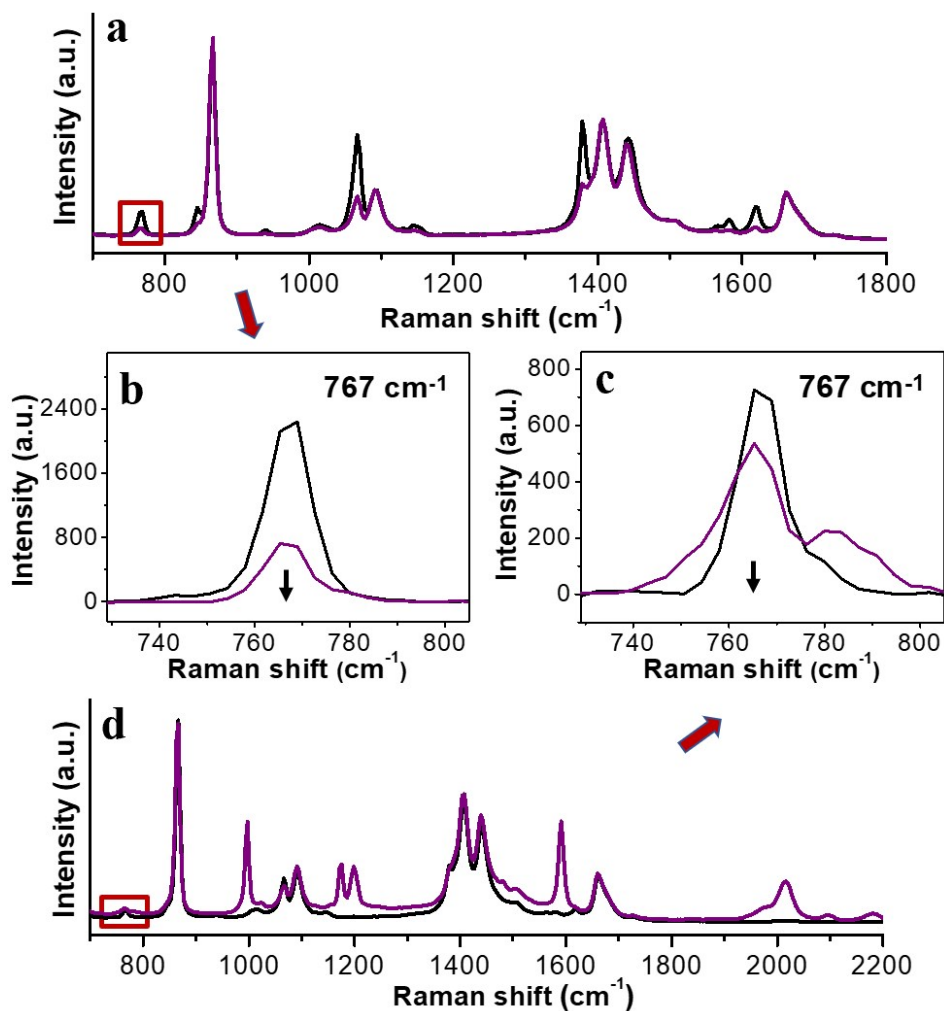

**Figure S17.** (a) The SERS intensity reduction 20 times of citrate-AuNPs incubated with 2-NT in DMF. (b) Expansion of the framed region in a. (c) Expansion of the framed region in d. (d) The SERS intensity of 0.41  $\mu\text{M}$  2-NT-AuNPs incubated with 20 mM PhA in DMF.

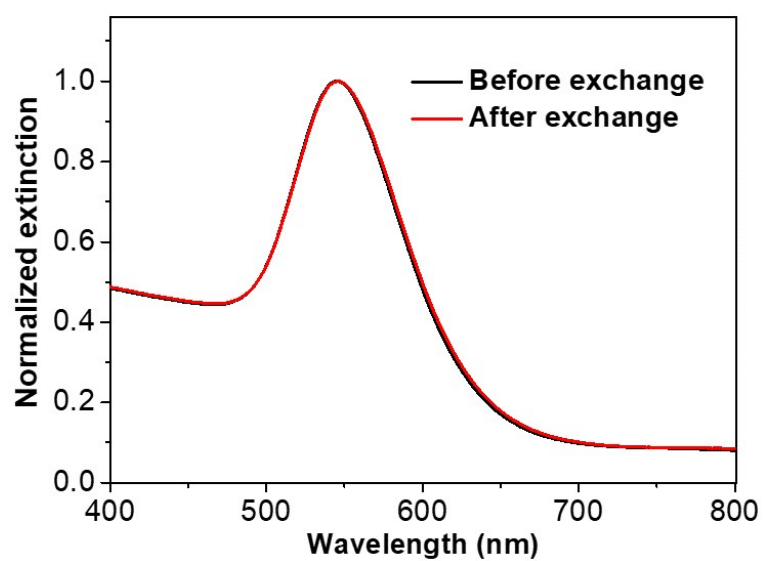

**Figure S18.** UV-vis spectra of AuNPs in DMF before and after PVP exchange PhA.

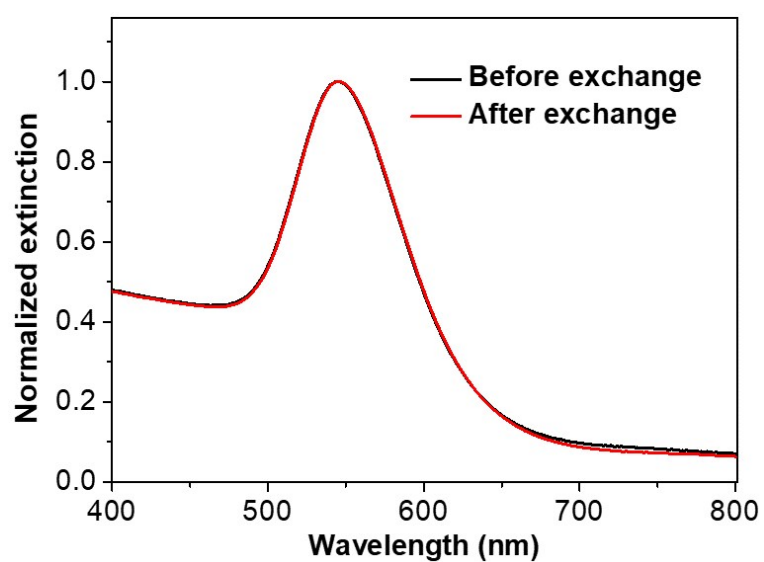

**Figure S19.** UV-vis spectra of AuNPs in DMF before and after PhA exchange PVP.

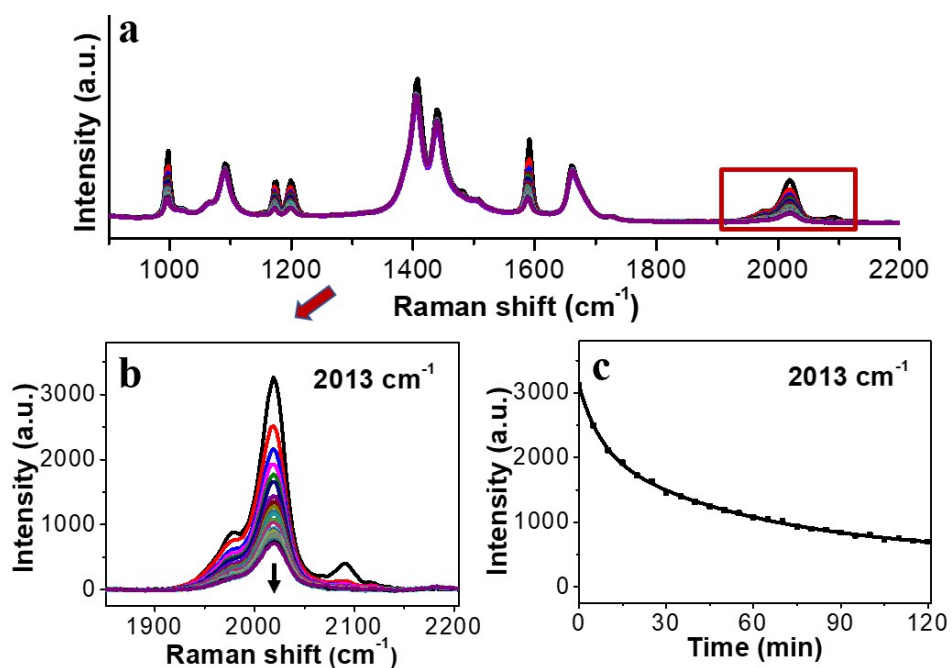

**Figure S20.** (a) Temporal evolution of the SERS intensity of 8.3  $\mu\text{M}$  PhA-AuNPs incubated with 2.5 mM PVP in DMF. (b) Expansion of the framed region in a. (c) Intensity traces of the peak in b.

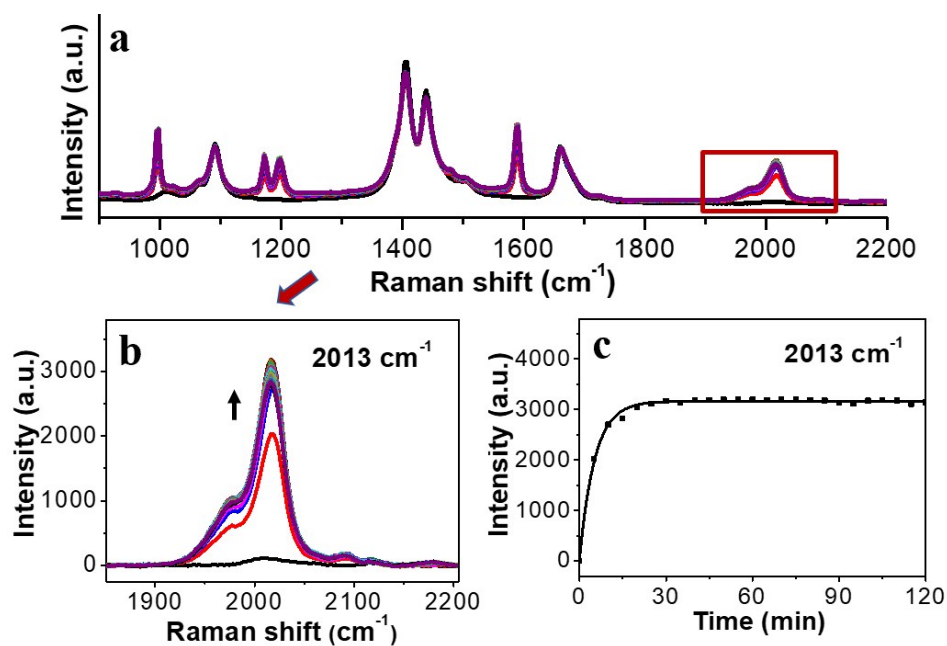

**Figure S21.** (a) Temporal evolution of the SERS intensity of 8.3  $\mu\text{M}$  PVP-AuNPs incubated with 8.2  $\mu\text{M}$  PhA in DMF. (b) Expansion of the framed region in a. (c) Intensity traces of the peak in b.

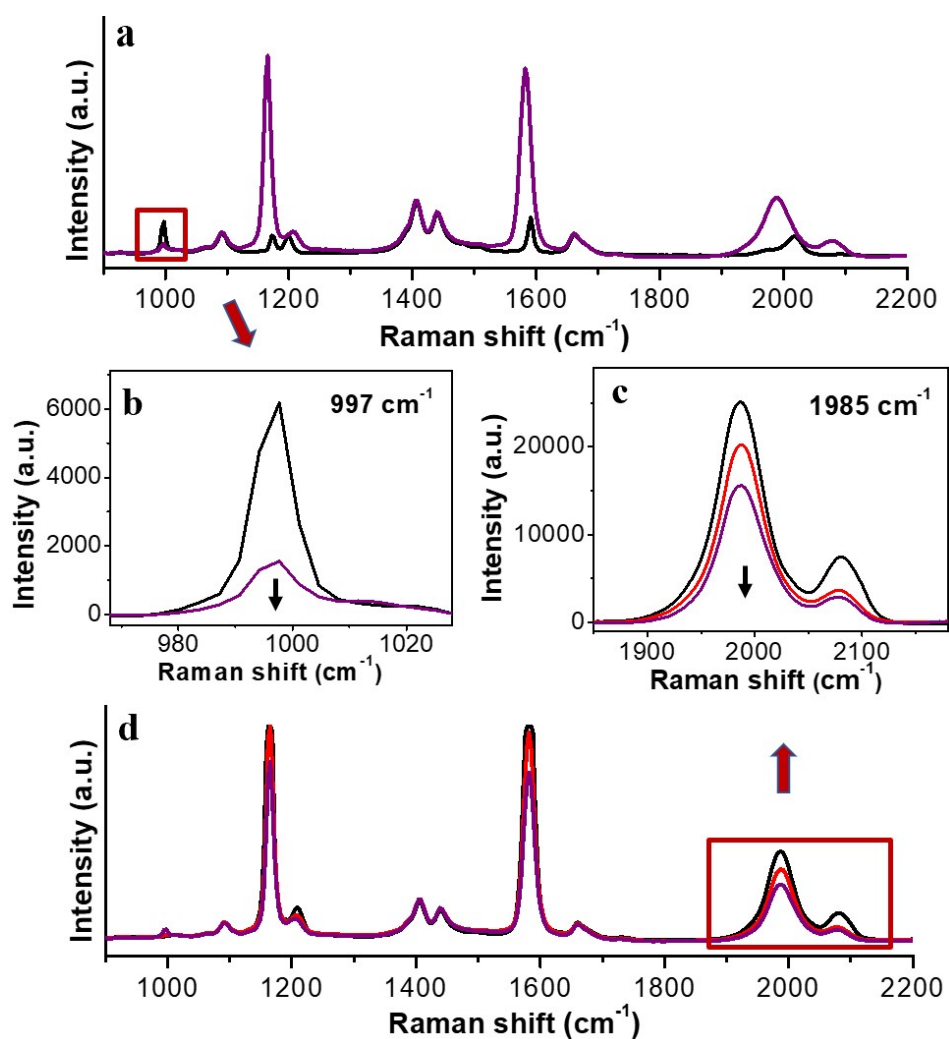

**Figure S22.** (a) Temporal evolution of the SERS intensity of 8.3  $\mu\text{M}$  PhA-AuNPs incubated with 8.2  $\mu\text{M}$  1 in DMF. (b) Expansion of the framed region in a. (c) Expansion of the framed region in d. (d) Temporal evolution of the SERS intensity of 8.3  $\mu\text{M}$  1-AuNPs incubated with 8.2  $\mu\text{M}$  (red) and 82  $\mu\text{M}$  (purple) PhA in DMF.

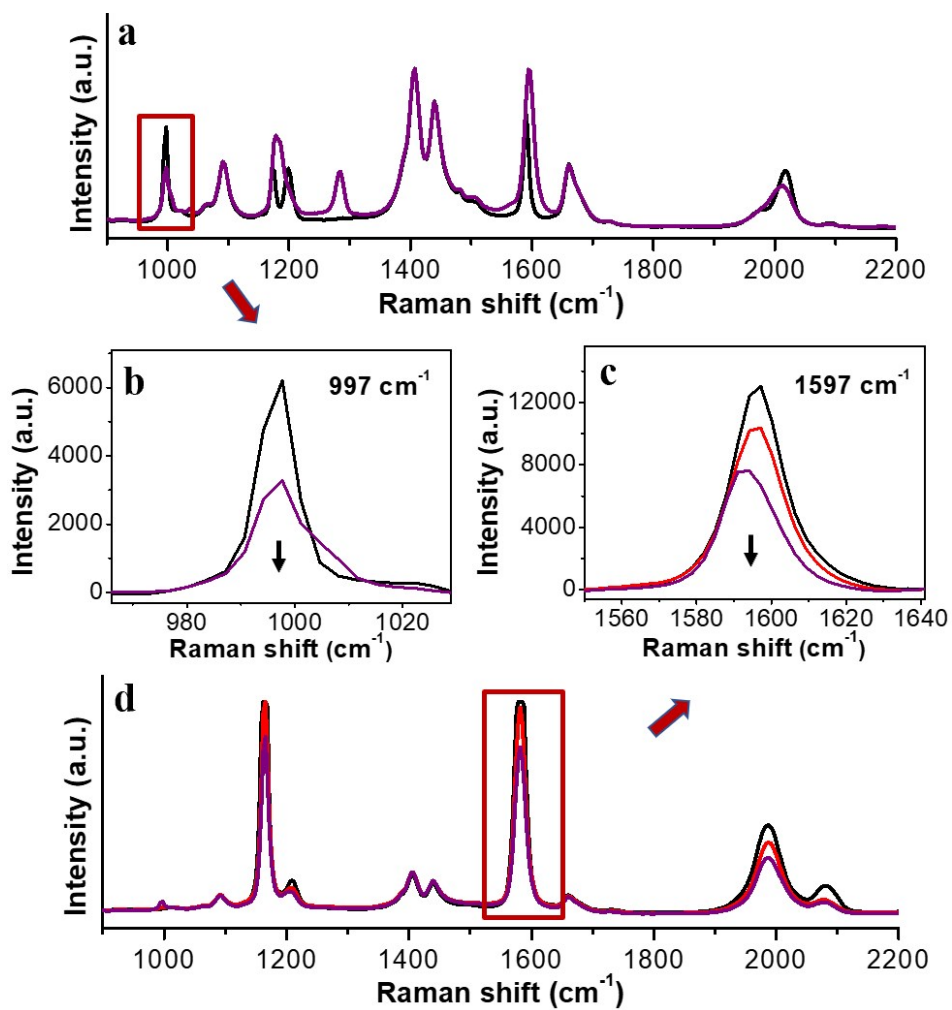

**Figure S23.** (a) Temporal evolution of the SERS intensity of 8.3  $\mu\text{M}$  PhA-AuNPs incubated with 8.2  $\mu\text{M}$  2 in DMF. (b) Expansion of the framed region in a. (c) Expansion of the framed region in d. (d) Temporal evolution of the SERS intensity of 8.3  $\mu\text{M}$  2-AuNPs incubated with 8.2  $\mu\text{M}$  (red) and 82  $\mu\text{M}$  (purple) PhA in DMF.

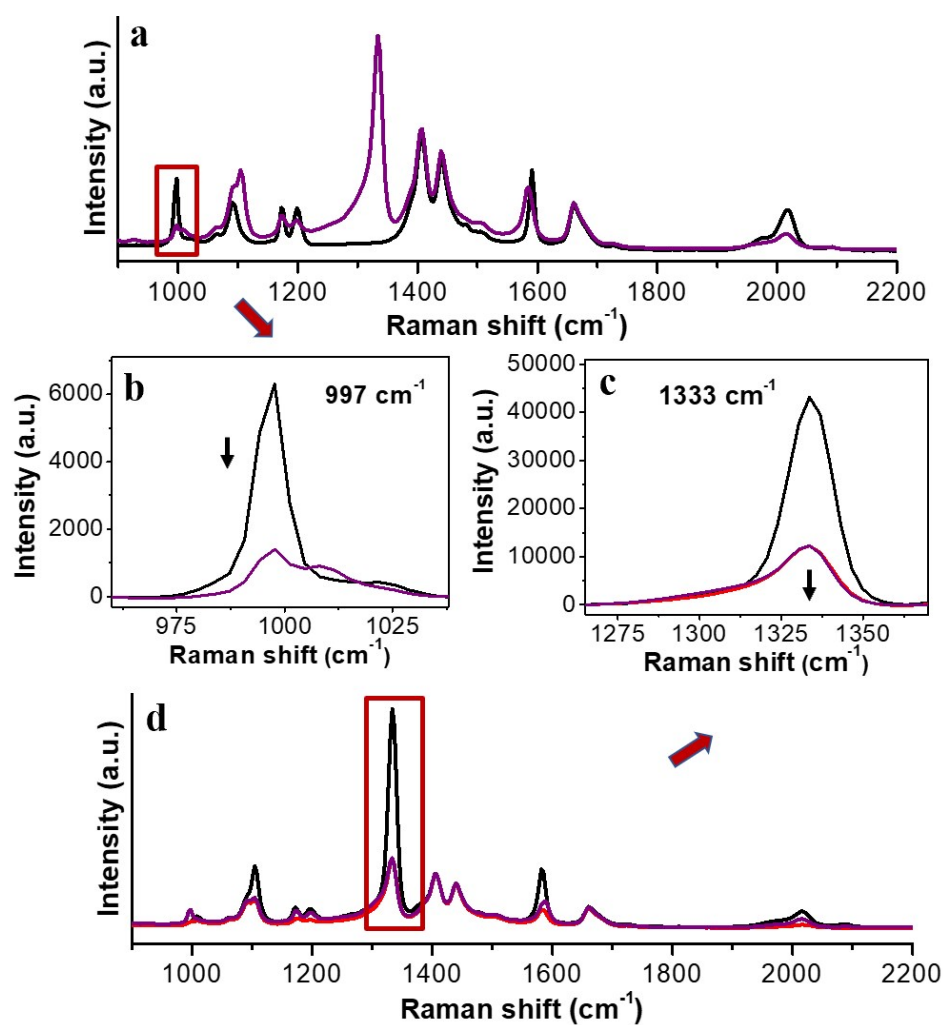

**Figure S24.** (a) Temporal evolution of the SERS intensity of 8.3  $\mu\text{M}$  PhA-AuNPs incubated with 8.2  $\mu\text{M}$  3 in DMF. (b) Expansion of the framed region in a. (c) Expansion of the framed region in d. (d) Temporal evolution of the SERS intensity of 8.3  $\mu\text{M}$  3-AuNPs incubated with 8.2  $\mu\text{M}$  (red) and 82  $\mu\text{M}$  (purple) PhA in DMF.

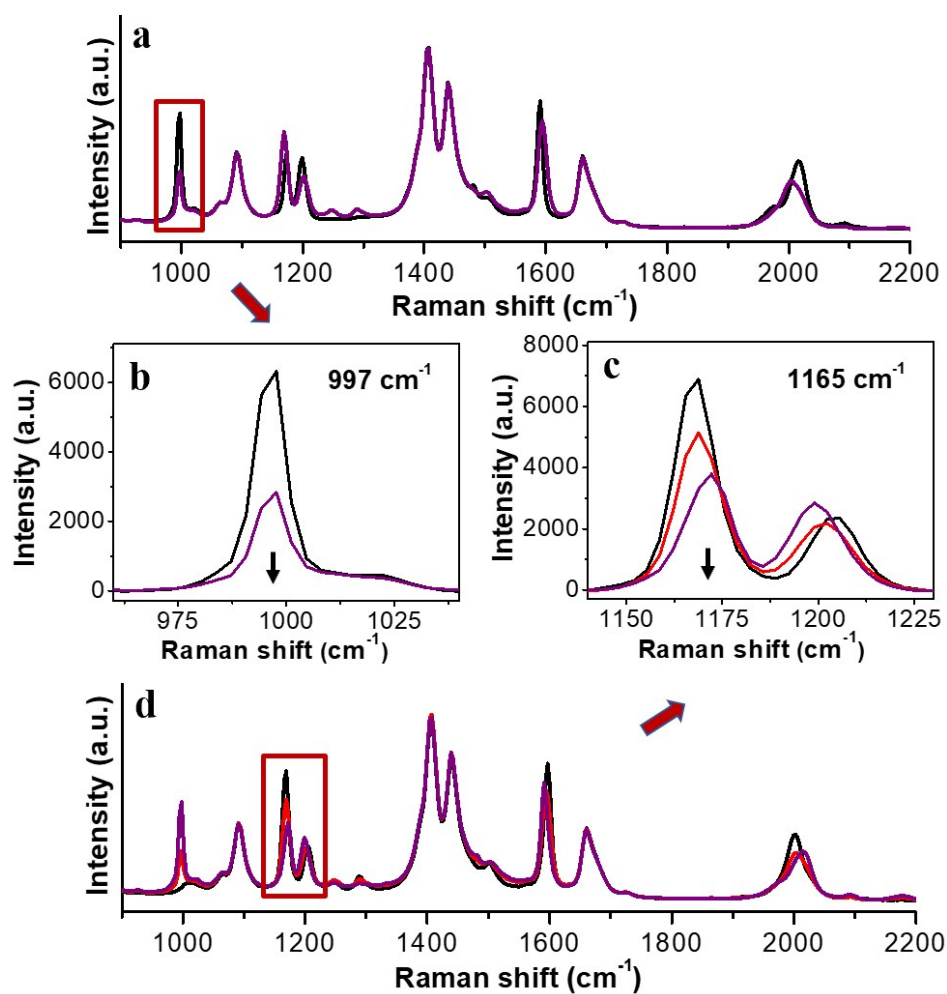

**Figure S25.** (a) Temporal evolution of the SERS intensity of 8.3  $\mu\text{M}$  PhA-AuNPs incubated with 8.2  $\mu\text{M}$  4 in DMF. (b) Expansion of the framed region in a. (c) Expansion of the framed region in d. (d) Temporal evolution of the SERS intensity of 8.3  $\mu\text{M}$  4-AuNPs incubated with 8.2  $\mu\text{M}$  (red) and 82  $\mu\text{M}$  (purple) PhA in DMF.

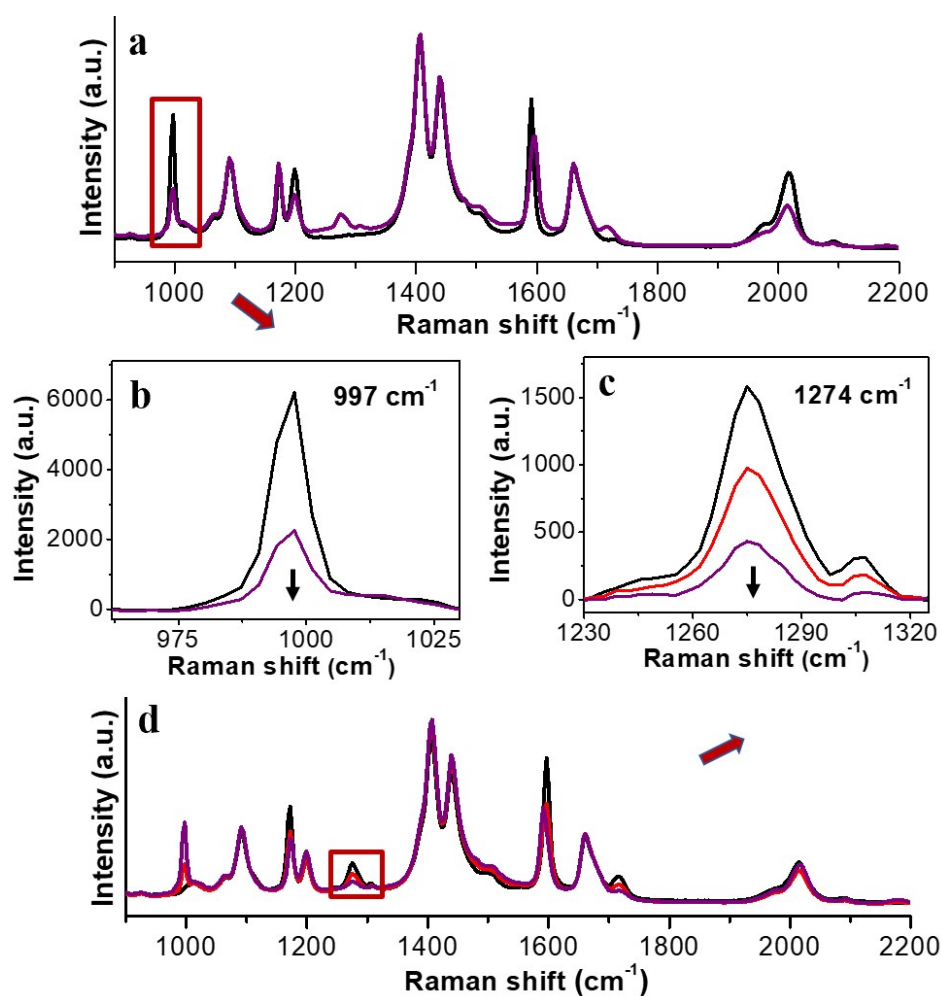

**Figure S26.** (a) Temporal evolution of the SERS intensity of 8.3  $\mu\text{M}$  PhA-AuNPs incubated with 8.2  $\mu\text{M}$  5 in DMF. (b) Expansion of the framed region in a. (c) Expansion of the framed region in d. (d) Temporal evolution of the SERS intensity of 8.3  $\mu\text{M}$  5-AuNPs incubated with 8.2  $\mu\text{M}$  (red) and 82  $\mu\text{M}$  (purple) PhA in DMF.

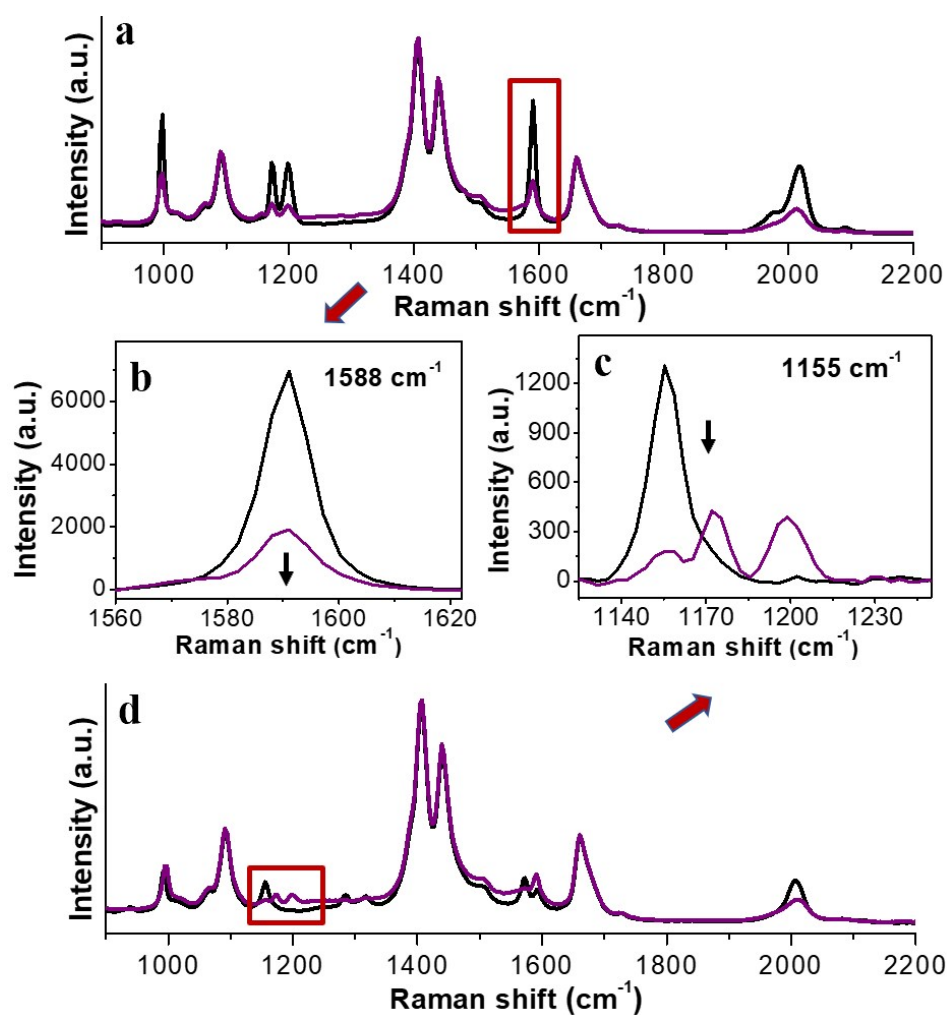

**Figure S27.** (a) Temporal evolution of the SERS intensity of 8.3  $\mu\text{M}$  PhA-AuNPs incubated with 8.2  $\mu\text{M}$  6 in DMF. (b) Expansion of the framed region in a. (c) Expansion of the framed region in d. (d) Temporal evolution of the SERS intensity of 8.3  $\mu\text{M}$  6-AuNPs incubated with 8.2  $\mu\text{M}$  PhA in DMF.

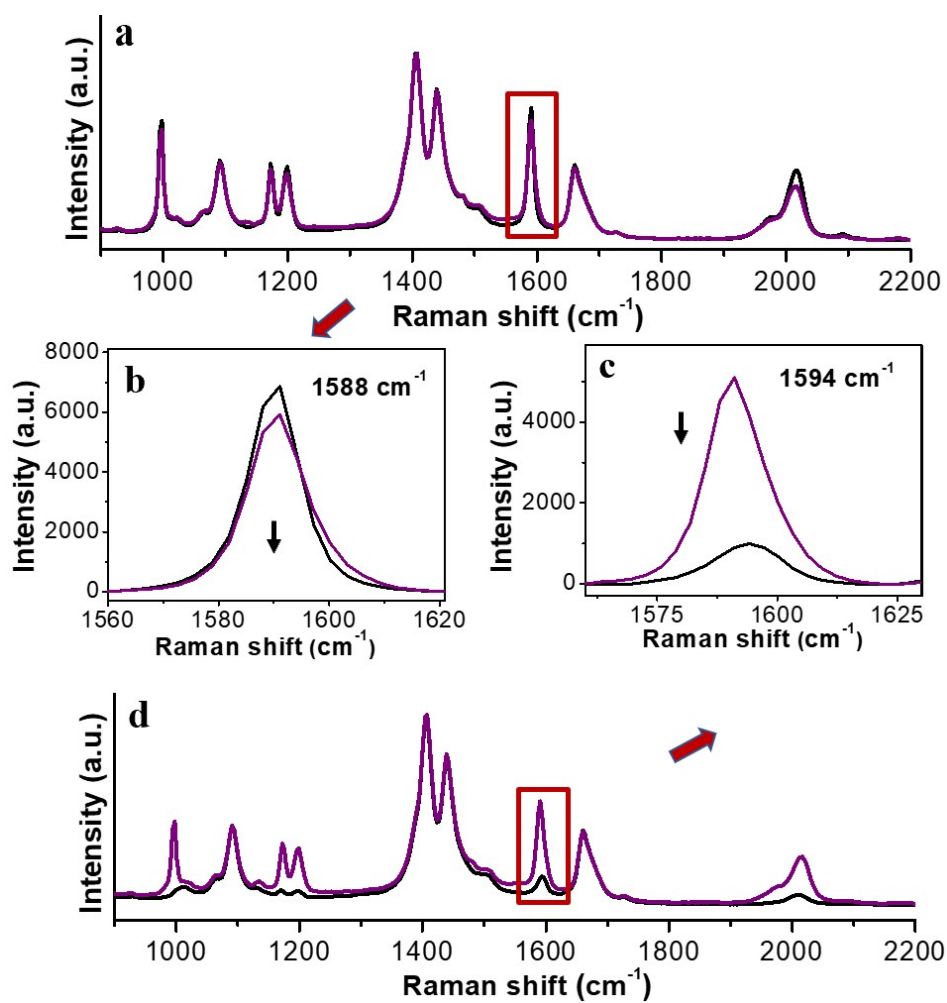

**Figure S28.** (a) Temporal evolution of the SERS intensity of 8.3  $\mu\text{M}$  PhA-AuNPs incubated with 8.2  $\mu\text{M}$  7 in DMF. (b) Expansion of the framed region in a. (c) Expansion of the framed region in d. (d) Temporal evolution of the SERS intensity of 8.3  $\mu\text{M}$  7-AuNPs incubated with 8.2  $\mu\text{M}$  PhA in DMF.

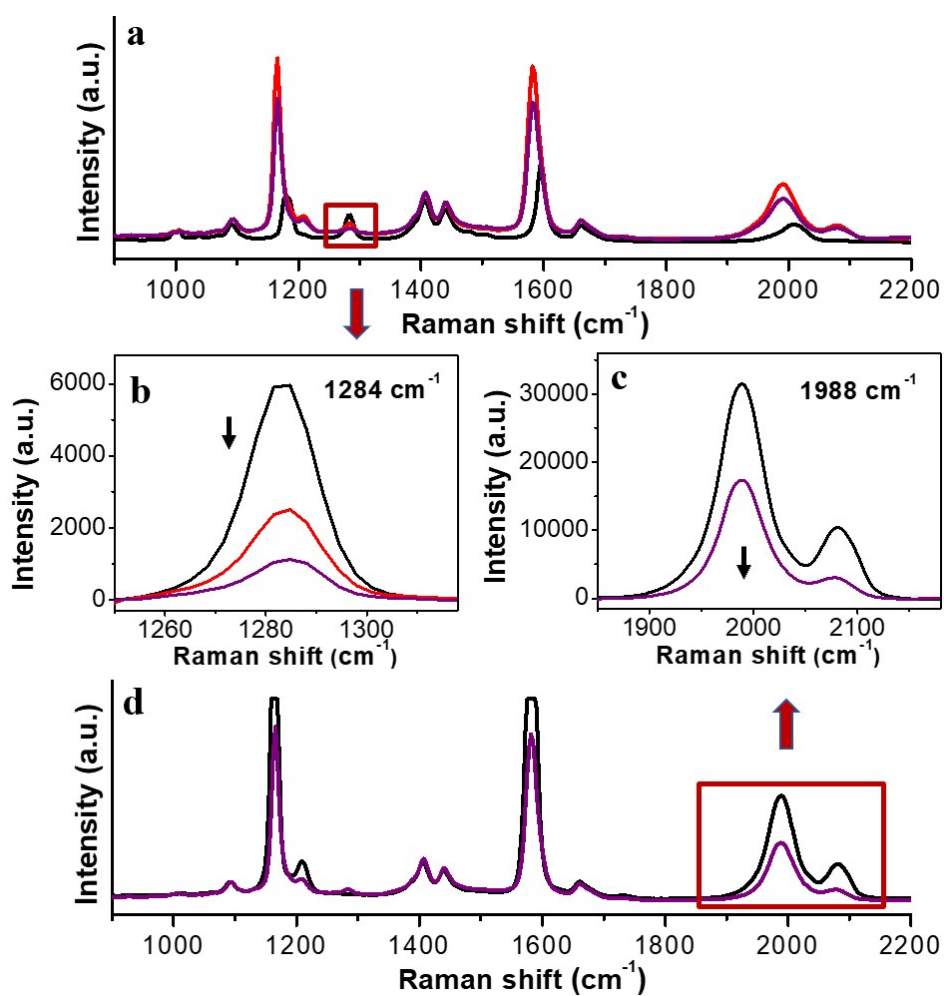

**Figure S29.** (a) Temporal evolution of the SERS intensity of  $8.3 \mu\text{M}$  2-AuNPs incubated with  $8.2 \mu\text{M}$  (red) and  $82 \mu\text{M}$  (purple) 1 in DMF. (b) Expansion of the framed region in a. (c) Expansion of the framed region in d. (d) Temporal evolution of the SERS intensity of  $8.3 \mu\text{M}$  1-AuNPs incubated with  $82 \mu\text{M}$  2 in DMF.

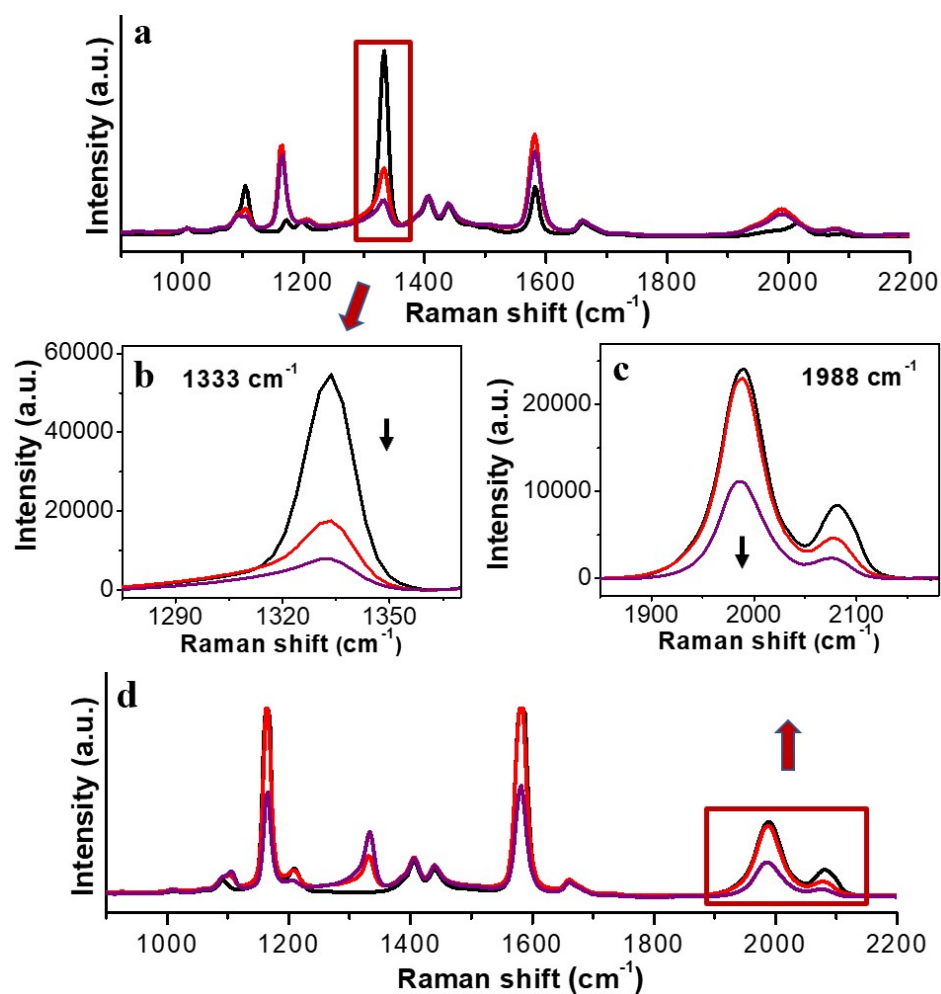

**Figure S30.** (a) Temporal evolution of the SERS intensity of 8.3  $\mu\text{M}$  3-AuNPs incubated with 8.2  $\mu\text{M}$  (red) and 82  $\mu\text{M}$  (purple) 1 in DMF. (b) Expansion of the framed region in a. (c) Expansion of the framed region in d. (d) Temporal evolution of the SERS intensity of 8.3  $\mu\text{M}$  1-AuNPs incubated with 8.2  $\mu\text{M}$  (red) and 82  $\mu\text{M}$  (purple) 3 in DMF.

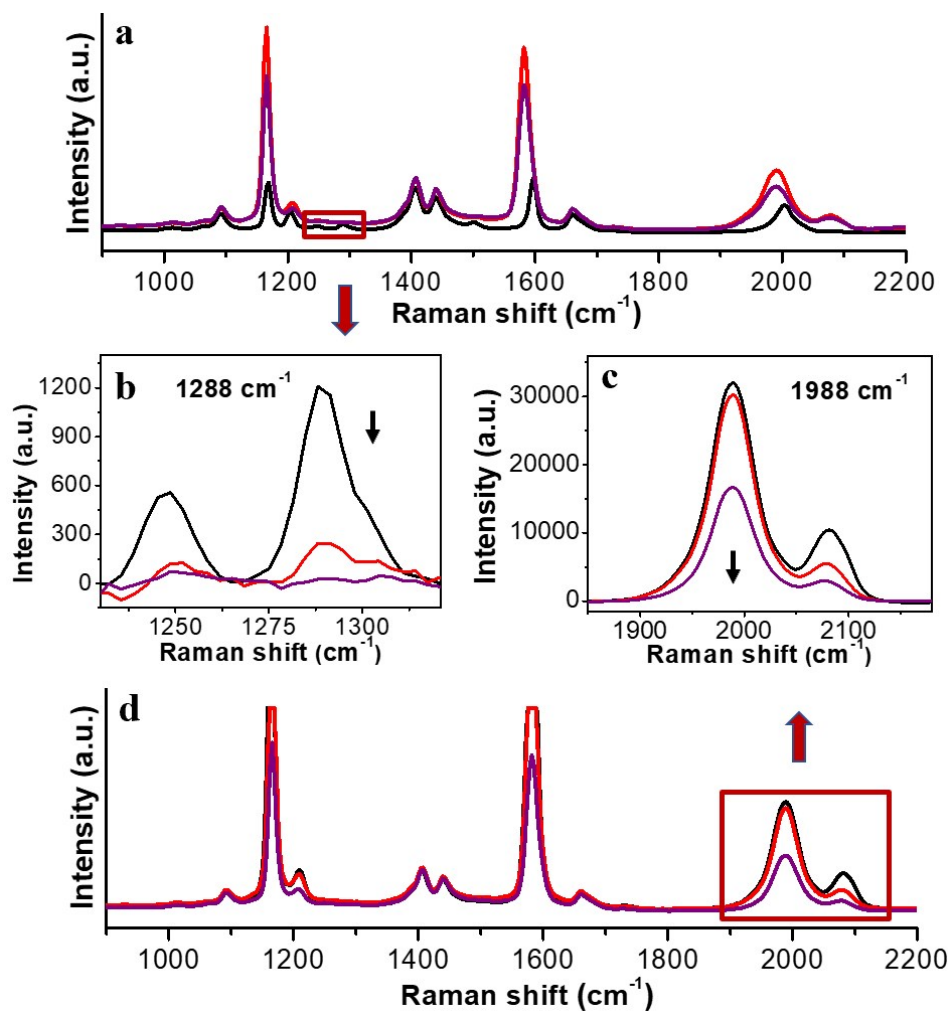

**Figure S31.** (a) Temporal evolution of the SERS intensity of 8.3  $\mu\text{M}$  4-AuNPs incubated with 8.2  $\mu\text{M}$  (red) and 82  $\mu\text{M}$  (purple) 1 in DMF. (b) Expansion of the framed region in a. (c) Expansion of the framed region in d. (d) Temporal evolution of the SERS intensity of 8.3  $\mu\text{M}$  1-AuNPs incubated with 8.2  $\mu\text{M}$  (red) and 82  $\mu\text{M}$  (purple) 4 in DMF.

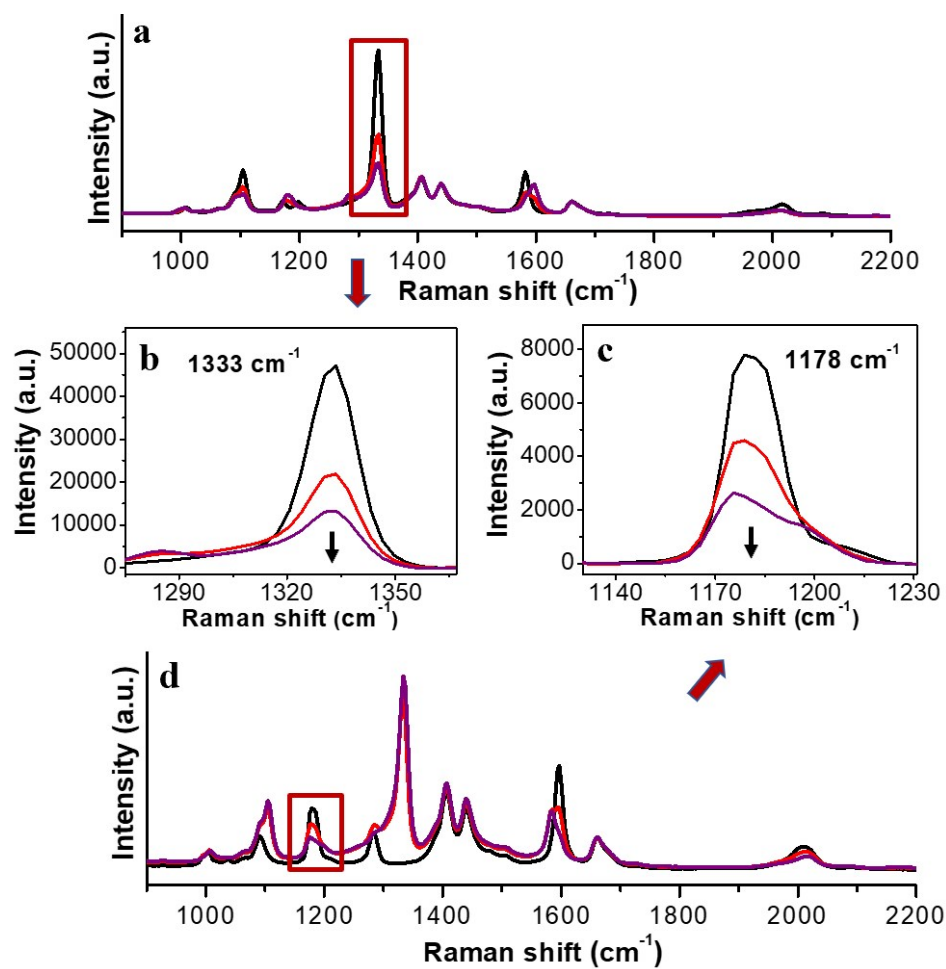

**Figure S32.** (a) Temporal evolution of the SERS intensity of 8.3  $\mu\text{M}$  3-AuNPs incubated with 8.2  $\mu\text{M}$  (red) and 82  $\mu\text{M}$  (purple) 2 in DMF. (b) Expansion of the framed region in a. (c) Expansion of the framed region in d. (b) Temporal evolution of the SERS intensity of 8.3  $\mu\text{M}$  2-AuNPs incubated with 8.2  $\mu\text{M}$  (red) and 82  $\mu\text{M}$  (purple) 3 in DMF.

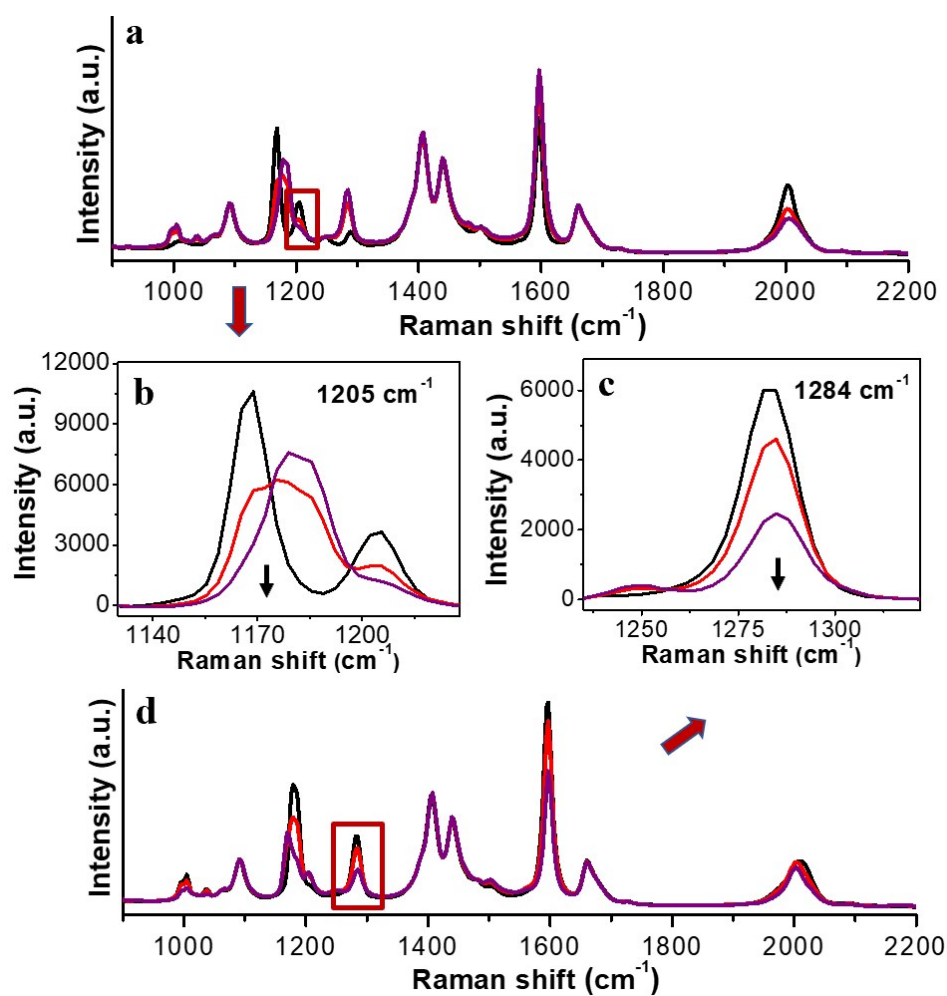

**Figure S33.** (a) Temporal evolution of the SERS intensity of 8.3  $\mu\text{M}$  4-AuNPs incubated with 8.2  $\mu\text{M}$  (red) and 82  $\mu\text{M}$  (purple) 2 in DMF. (b) Expansion of the framed region in a. (c) Expansion of the framed region in d. (d) Temporal evolution of the SERS intensity of 8.3  $\mu\text{M}$  2-AuNPs incubated with 8.2  $\mu\text{M}$  (red) and 82  $\mu\text{M}$  (purple) 4 in DMF.

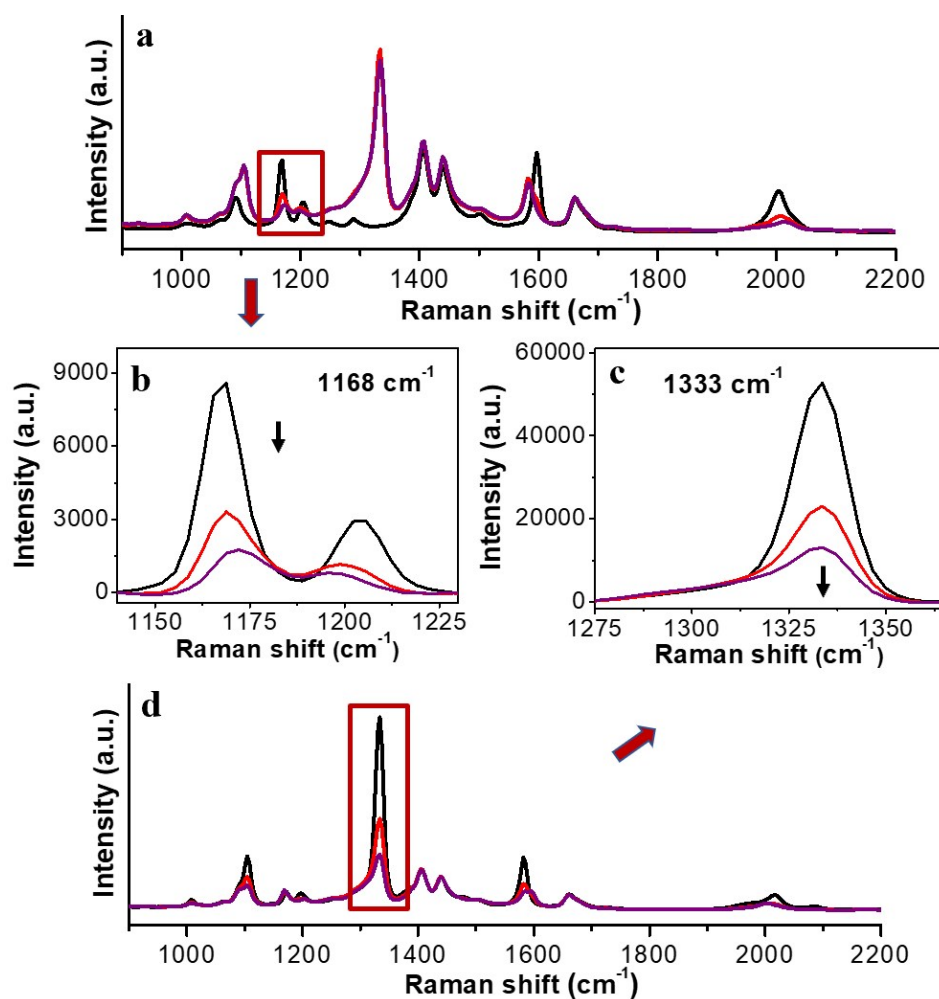

**Figure S34.** (a) Temporal evolution of the SERS intensity of 8.3  $\mu\text{M}$  4-AuNPs incubated with 8.2  $\mu\text{M}$  (red) and 82  $\mu\text{M}$  (purple) 3 in DMF. (b) Expansion of the framed region in a. (c) Expansion of the framed region in d. (d) Temporal evolution of the SERS intensity of 8.3  $\mu\text{M}$  3-AuNPs incubated with 8.2  $\mu\text{M}$  (red) and 82  $\mu\text{M}$  (purple) 4 in DMF.

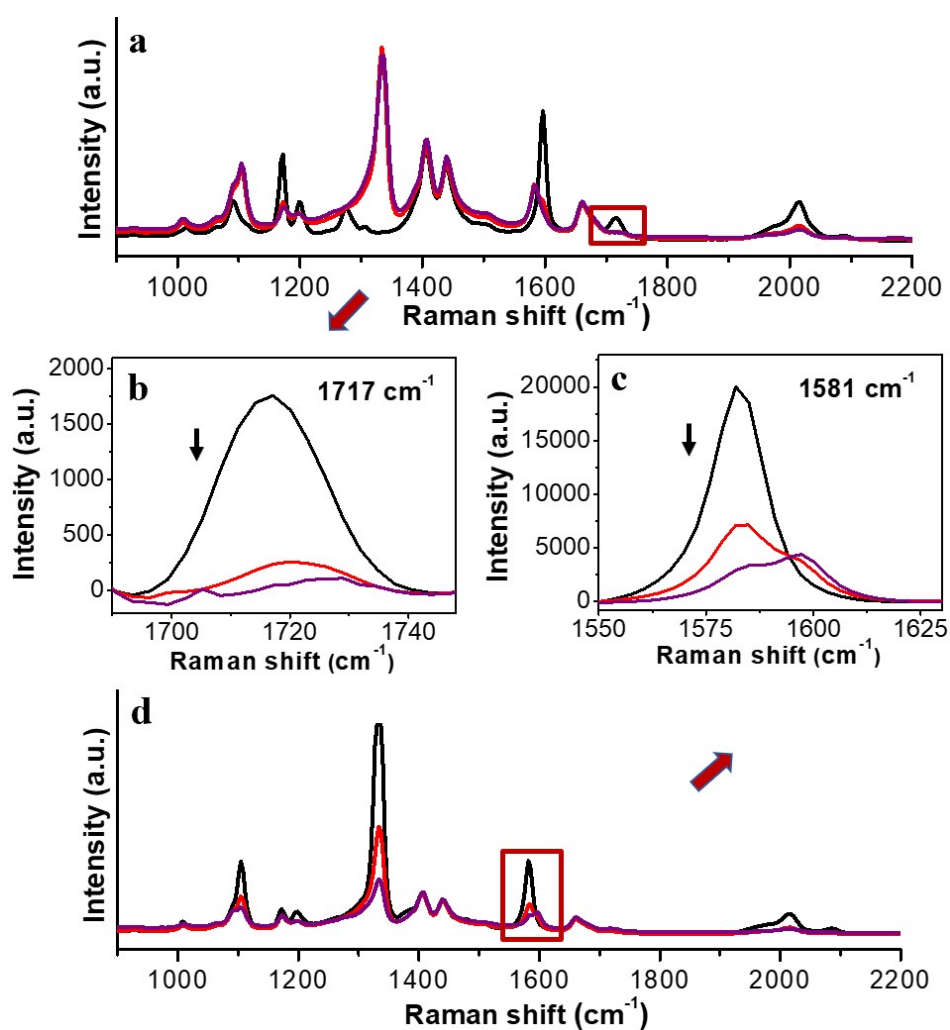

**Figure S35.** (a) Temporal evolution of the SERS intensity of 8.3  $\mu\text{M}$  5-AuNPs incubated with 8.2  $\mu\text{M}$  (red) and 82  $\mu\text{M}$  (purple) 3 in DMF. (b) Expansion of the framed region in a. (c) Expansion of the framed region in d. (d) Temporal evolution of the SERS intensity of 8.3  $\mu\text{M}$  3-AuNPs incubated with 8.2  $\mu\text{M}$  (red) and 82  $\mu\text{M}$  (purple) 5 in DMF.

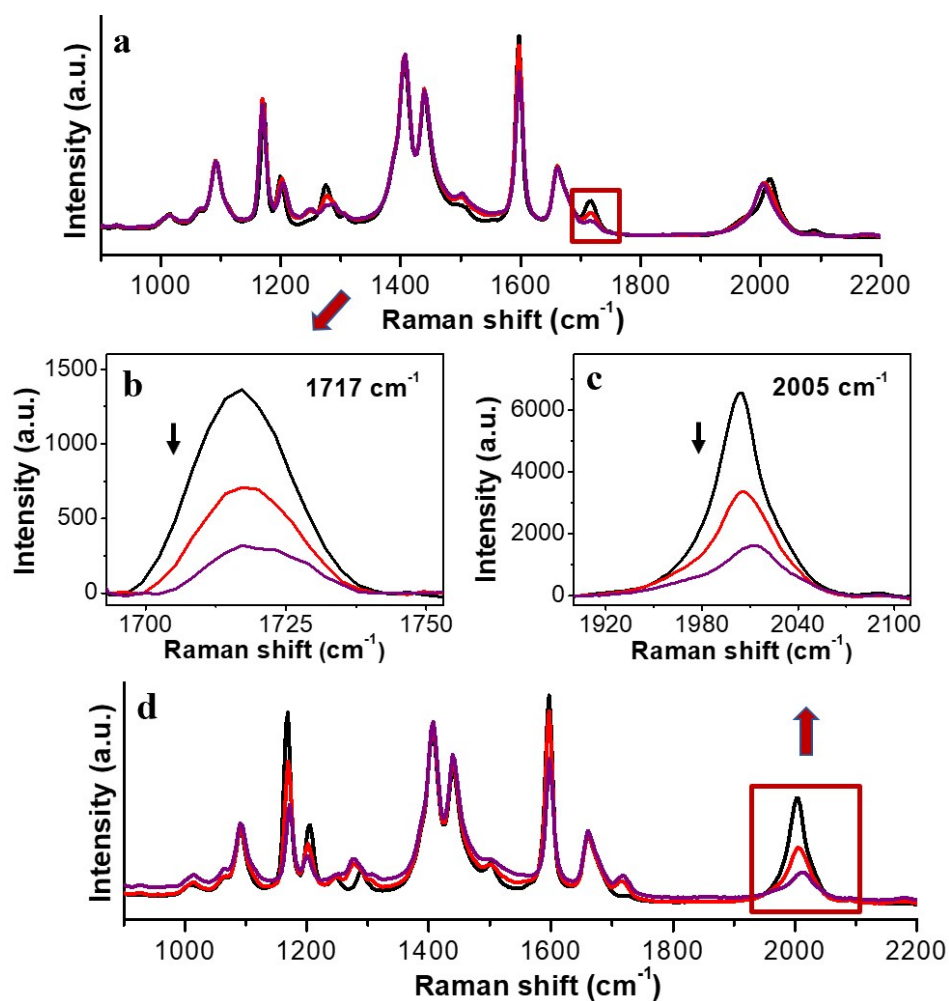

**Figure S36.** (a) Temporal evolution of the SERS intensity of 8.3  $\mu\text{M}$  5-AuNPs incubated with 8.2  $\mu\text{M}$  (red) and 82  $\mu\text{M}$  (purple) 4 in DMF. (b) Expansion of the framed region in a. (c) Expansion of the framed region in d. (d) Temporal evolution of the SERS intensity of 8.3  $\mu\text{M}$  4-AuNPs incubated with 8.2  $\mu\text{M}$  (red) and 82  $\mu\text{M}$  (purple) 5 in DMF.

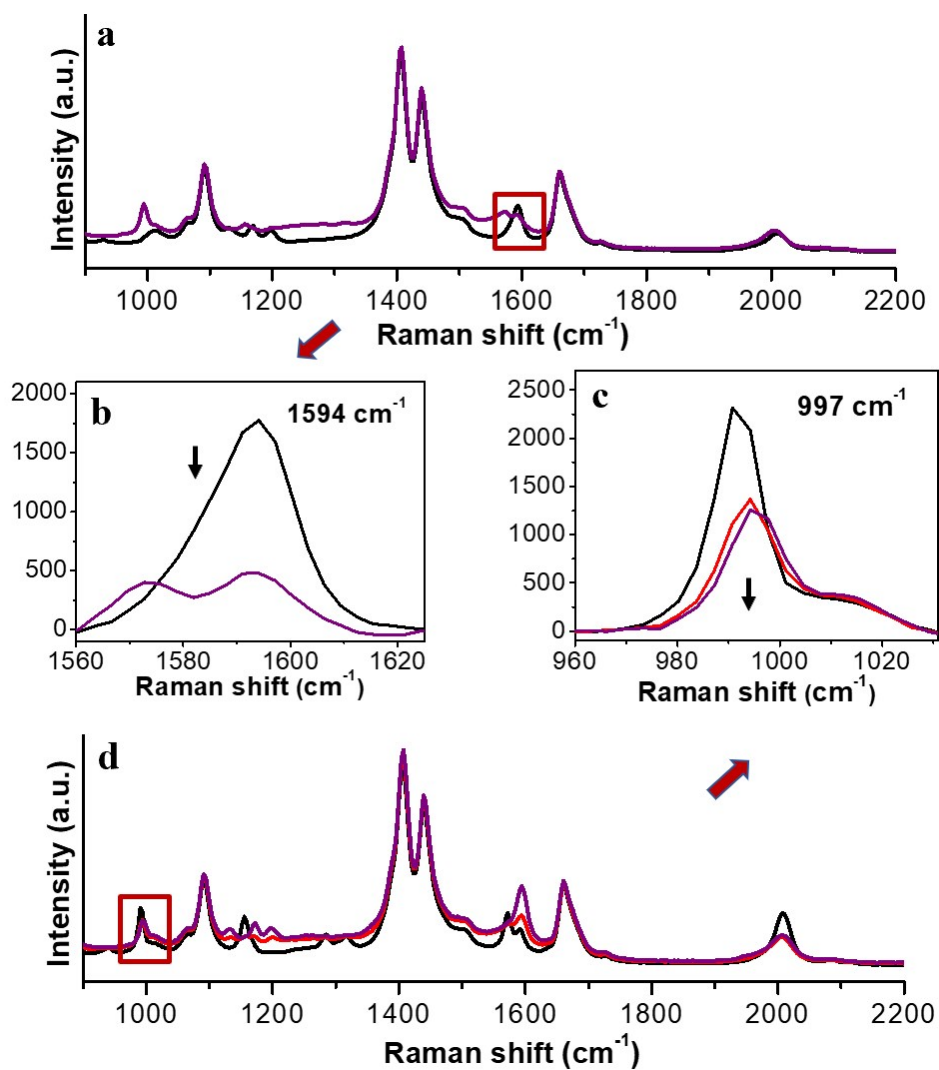

**Figure S37.** (a) Temporal evolution of the SERS intensity of 8.3  $\mu\text{M}$  7-AuNPs incubated with 8.2  $\mu\text{M}$  6 in DMF. (b) Expansion of the framed region in a. (c) Expansion of the framed region in d. (c) Temporal evolution of the SERS intensity of 8.3  $\mu\text{M}$  6-AuNPs incubated with 8.2  $\mu\text{M}$  (red) and 82  $\mu\text{M}$  (purple) 7 in DMF.

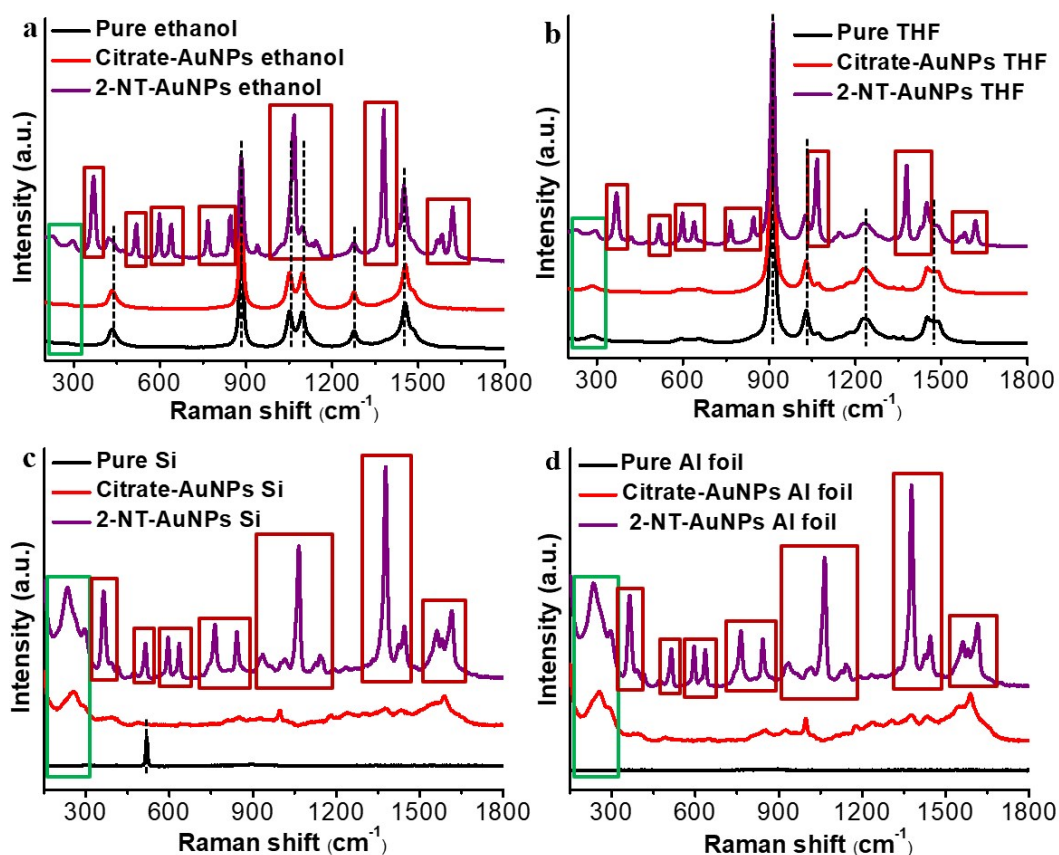

**Figure S38.** (a) Raman spectra of pure ethanol (black); SERS intensity of 60 nm citrate-AuNPs (red), 2-NT-AuNPs (purple) in ethanol. (b) Raman spectra of pure THF (black); SERS intensity of 60 nm citrate-AuNPs (red), 2-NT-AuNPs (purple) in THF. (c) Raman spectra of pure Si (black); SERS intensity of 60 nm citrate-AuNPs (red), 2-NT-AuNPs (purple) on Si. (d) Raman spectra of pure Al foil (black); SERS intensity of 60 nm citrate-AuNPs (red), 2-NT-AuNPs (purple) on Al foil.

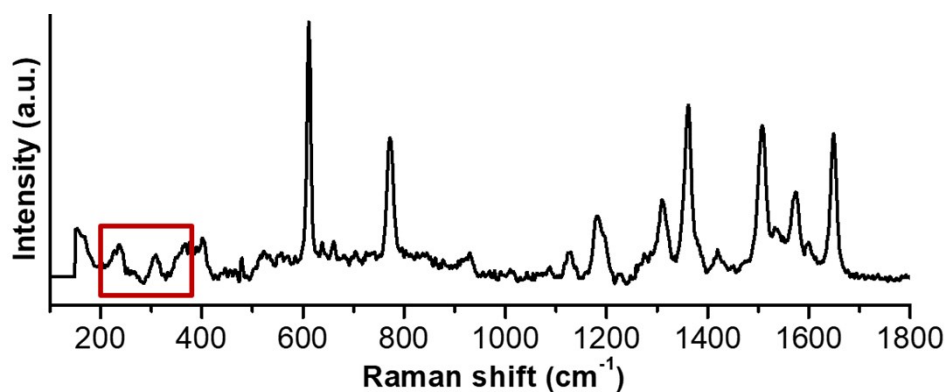

**Figure S39.** Raman spectra of pure 2-NT powder.

**Table S1.** Phenynyl ligands (1-7) mutual exchange PhA.

| Ligand exchange  | Raman shift (cm <sup>-1</sup> ) | Before | After | Degree |
|------------------|---------------------------------|--------|-------|--------|
| 1 ex. PhA (1:1)  | 997                             | 5461   | 1428  | 74%    |
| PhA ex. 1 (1:1)  | 1985                            | 25131  | 20215 | 20%    |
| PhA ex. 1 (10:1) | 1985                            | 25131  | 15566 | 38%    |
| 2 ex. PhA (1:1)  | 997                             | 5482   | 3000  | 45%    |
| PhA ex. 2 (1:1)  | 1597                            | 13032  | 10365 | 20%    |
| PhA ex. 2 (10:1) | 1597                            | 13032  | 7608  | 42%    |
| 3 ex. PhA (1:1)  | 997                             | 5572   | 0     | 100%   |
| PhA ex. 3 (1:1)  | 1333                            | 43171  | 12250 | 72%    |
| PhA ex. 3 (10:1) | 1333                            | 43171  | 12250 | 72%    |
| 4 ex. PhA (1:1)  | 997                             | 5876   | 2605  | 56%    |
| PhA ex. 4 (1:1)  | 1165                            | 6617   | 5142  | 22%    |
| PhA ex. 4 (10:1) | 1165                            | 6617   | 3790  | 43%    |
| 5 ex. PhA (1:1)  | 997                             | 5489   | 2030  | 63%    |
| PhA ex. 5 (1:1)  | 1274                            | 1583   | 976   | 38%    |
| PhA ex. 5 (10:1) | 1274                            | 1583   | 431   | 73%    |
| 6 ex. PhA (1:1)  | 1588                            | 6263   | 1812  | 71%    |
| PhA ex. 6 (1:1)  | 1155                            | 1307   | 0     | 100%   |
| 7 ex. PhA (1:1)  | 1588                            | 6526   | 5626  | 14%    |
| PhA ex. 7 (1:1)  | 1594                            | 990    | 0     | 100%   |

**Table S2.** Phenynyl ligands (1-7) mutual exchange each other.

| Ligand exchange | Raman shift (cm <sup>-1</sup> ) | Before | After | Degree |
|-----------------|---------------------------------|--------|-------|--------|
| 1 ex. 2 (1:1)   | 1284                            | 5937   | 2510  | 58%    |
| 1 ex. 2 (10:1)  | 1284                            | 5937   | 1118  | 81%    |
| 2 ex. 1 (10:1)  | 1988                            | 31532  | 17364 | 45%    |
| 1 ex. 3 (1:1)   | 1333                            | 54670  | 17560 | 68%    |
| 1 ex. 3 (10:1)  | 1333                            | 54670  | 7829  | 86%    |
| 3 ex. 1 (1:1)   | 1988                            | 24025  | 23034 | 4%     |
| 3 ex. 1 (10:1)  | 1988                            | 24025  | 11162 | 54%    |
| 1 ex. 4 (1:1)   | 1288                            | 1181   | 221   | 81%    |
| 1 ex. 4 (10:1)  | 1288                            | 1181   | 28    | 98%    |
| 4 ex. 1 (1:1)   | 1988                            | 32062  | 30302 | 5%     |
| 4 ex. 1 (10:1)  | 1988                            | 32062  | 16670 | 48%    |
| 2 ex. 3 (1:1)   | 1333                            | 43121  | 21544 | 50%    |
| 2 ex. 3 (10:1)  | 1333                            | 43121  | 13140 | 70%    |
| 3 ex. 2 (1:1)   | 1178                            | 7729   | 4589  | 41%    |
| 3 ex. 2 (10:1)  | 1178                            | 7729   | 2504  | 68%    |
| 2 ex. 4 (1:1)   | 1205                            | 3650   | 1960  | 46%    |
| 2 ex. 4 (10:1)  | 1205                            | 3650   | 1201  | 67%    |
| 4 ex. 2 (1:1)   | 1284                            | 6000   | 4605  | 23%    |
| 4 ex. 2 (10:1)  | 1284                            | 6000   | 2466  | 59%    |
| 3 ex. 4 (1:1)   | 1168                            | 8319   | 3311  | 60%    |
| 3 ex. 4 (10:1)  | 1168                            | 8319   | 1782  | 79%    |
| 4 ex. 3 (1:1)   | 1333                            | 52724  | 23049 | 56%    |
| 4 ex. 3 (10:1)  | 1333                            | 52724  | 13123 | 75%    |
| 3 ex. 5 (1:1)   | 1717                            | 1760   | 240   | 86%    |
| 3 ex. 5 (10:1)  | 1717                            | 1760   | 48    | 97%    |
| 5 ex. 3 (1:1)   | 1581                            | 20015  | 7109  | 64%    |
| 5 ex. 3 (10:1)  | 1581                            | 20015  | 4393  | 78%    |
| 4 ex. 5 (1:1)   | 1717                            | 1364   | 708   | 48%    |
| 4 ex. 5 (10:1)  | 1717                            | 1364   | 320   | 77%    |
| 5 ex. 4 (1:1)   | 2005                            | 6556   | 3377  | 48%    |
| 5 ex. 4 (10:1)  | 2005                            | 6556   | 1631  | 75%    |
| 6 ex. 7 (1:1)   | 1594                            | 1774   | 0     | 100%   |
| 7 ex. 6 (1:1)   | 997                             | 2201   | 1369  | 38%    |
| 7 ex. 6 (10:1)  | 997                             | 2201   | 1211  | 45%    |
